# Supplementary material for: Next-generation sequencing analysis of lager brewing yeast strains reveals the evolutionary history of interspecies hybridization
Source: PubMed Central journal article supplement — DNA Res. 2016 Jan 4;23(1):67–80. doi: 10.1093/dnares/dsv037 (PMC4755528; doi:10.1093/dnares/dsv037), 2016-01-04
Supplement: supp_dsv037_dsv037supp_figures.pdf [file supp_dsv037_dsv037supp_figures.pdf]

A)

Chr.VII:179,576..179,695 bp (KEM1)

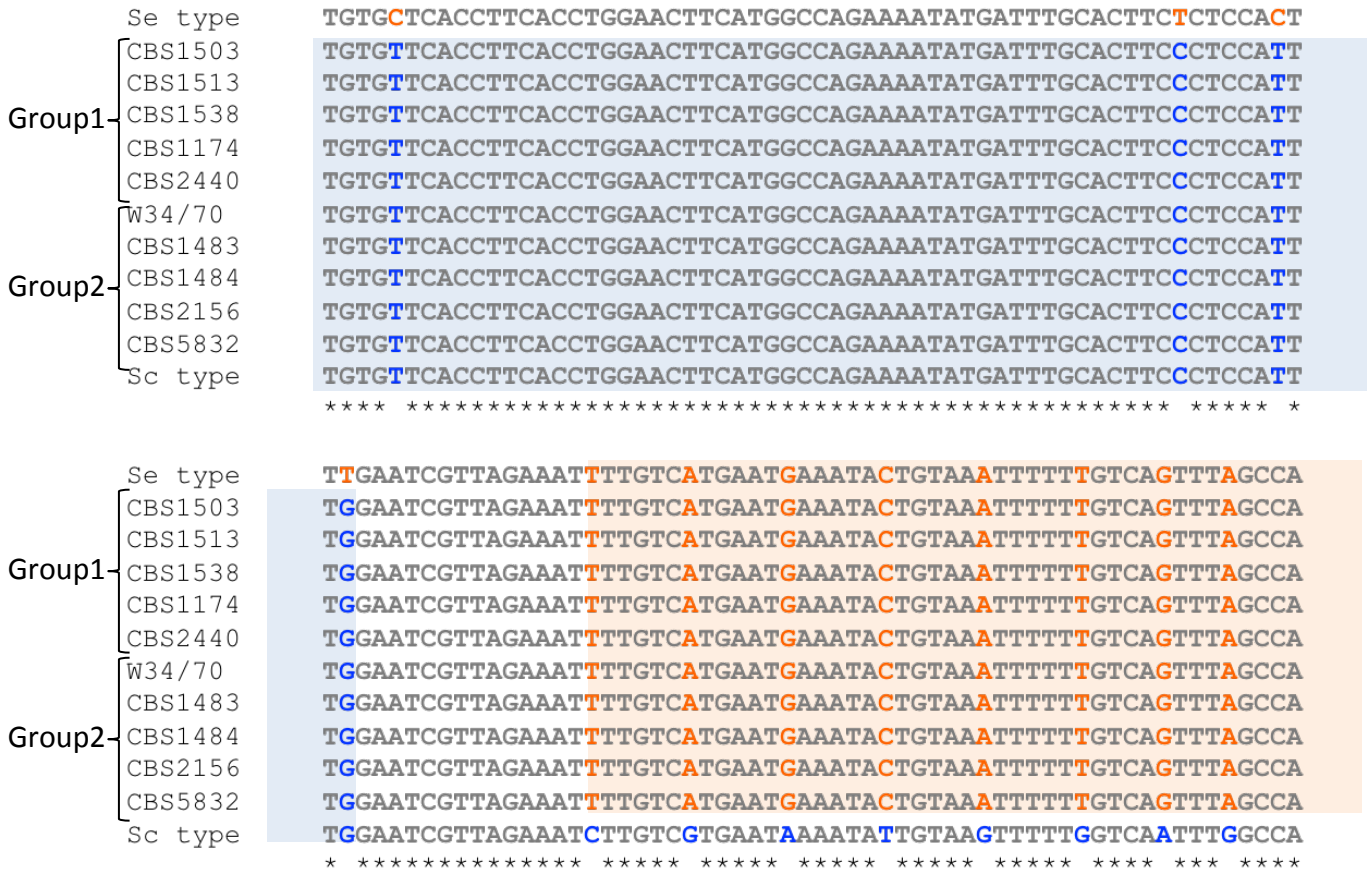

B)

Chr.XVI:96,939..97,118 bp (HSP82)

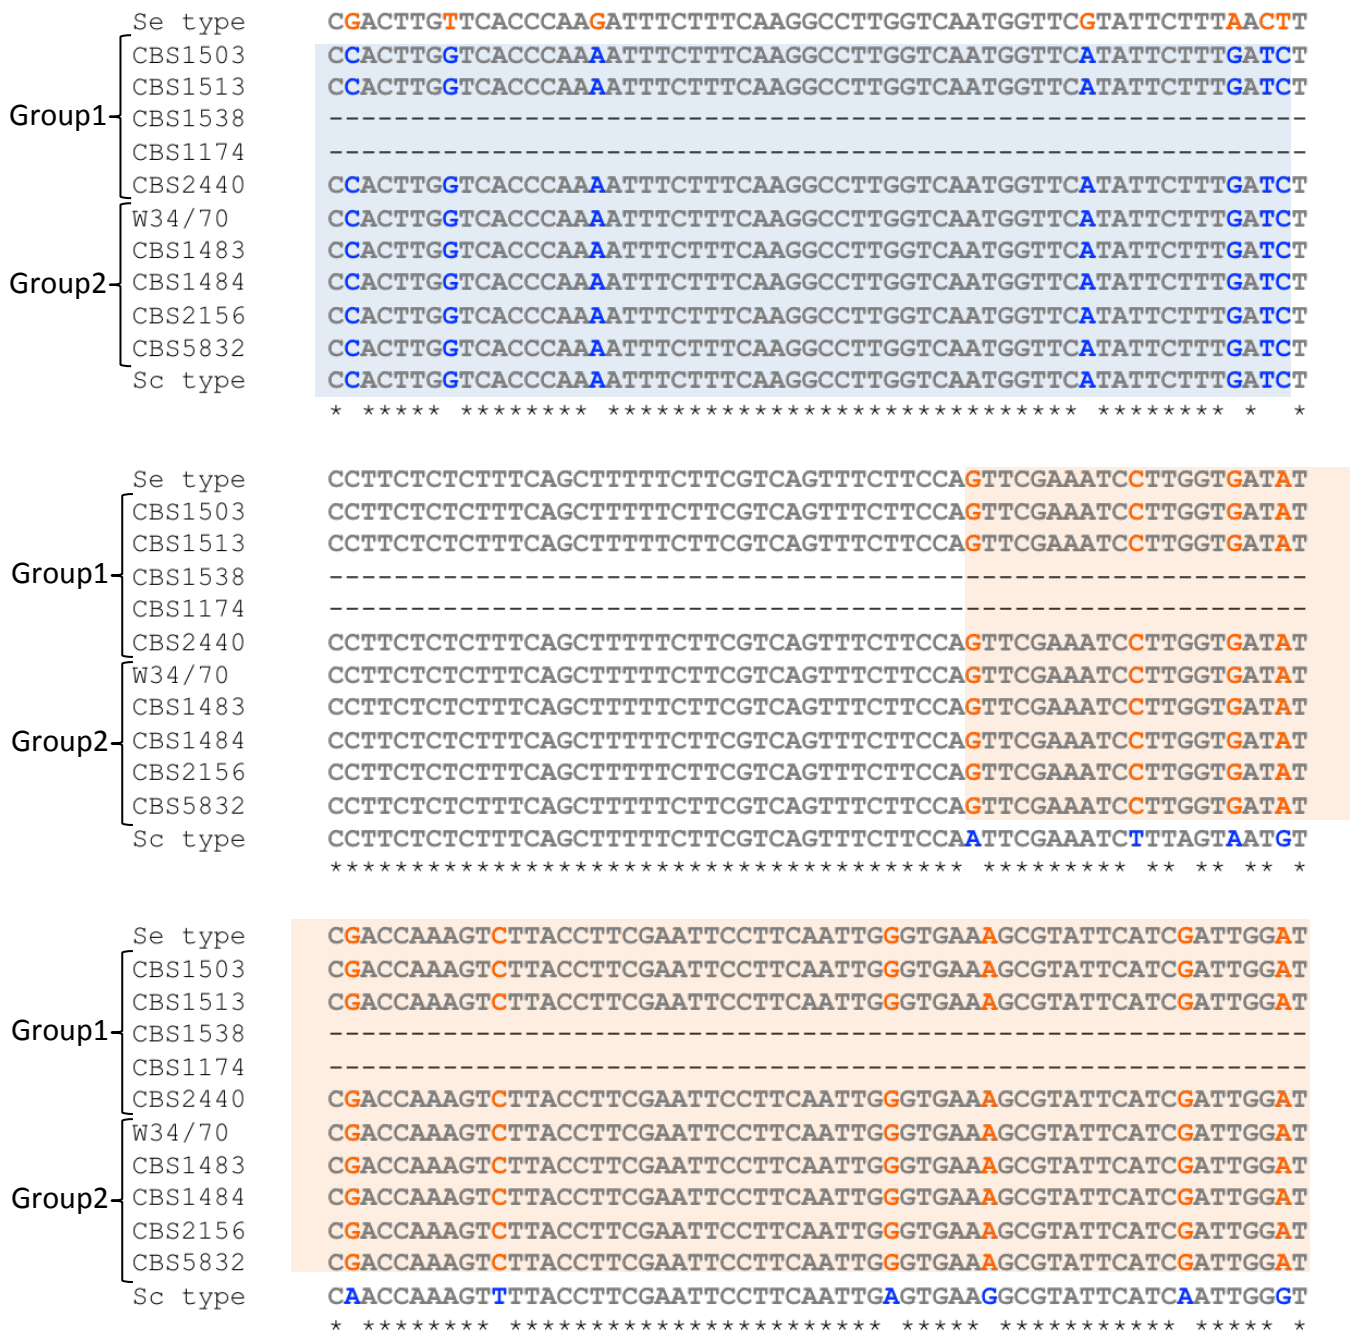

**Supplementary Figure 1. Multiple sequence alignment of 10 *S. pastorianus* strains surrounding the breakpoint (A.) KEM1 locus B.) HSP82 locus).**

Shown are multiple sequence alignments of *S. pastorianus* strains and parental species *S. cerevisiae* and *S. eubayanus* (Sc and Se types, respectively) surrounding the breakpoint regions. Sc and Se type sequences (SNVs) are indicated by blue and orange characters, respectively. Based on SNV distribution, blue and orange background regions were presumed to be derived from Sc- and Se-type parents. The breakpoint was matched at the nucleotide level across all Group 1 and 2 strains.

Chr.VII:1,062,758..1,062,937 bp (ZU01)

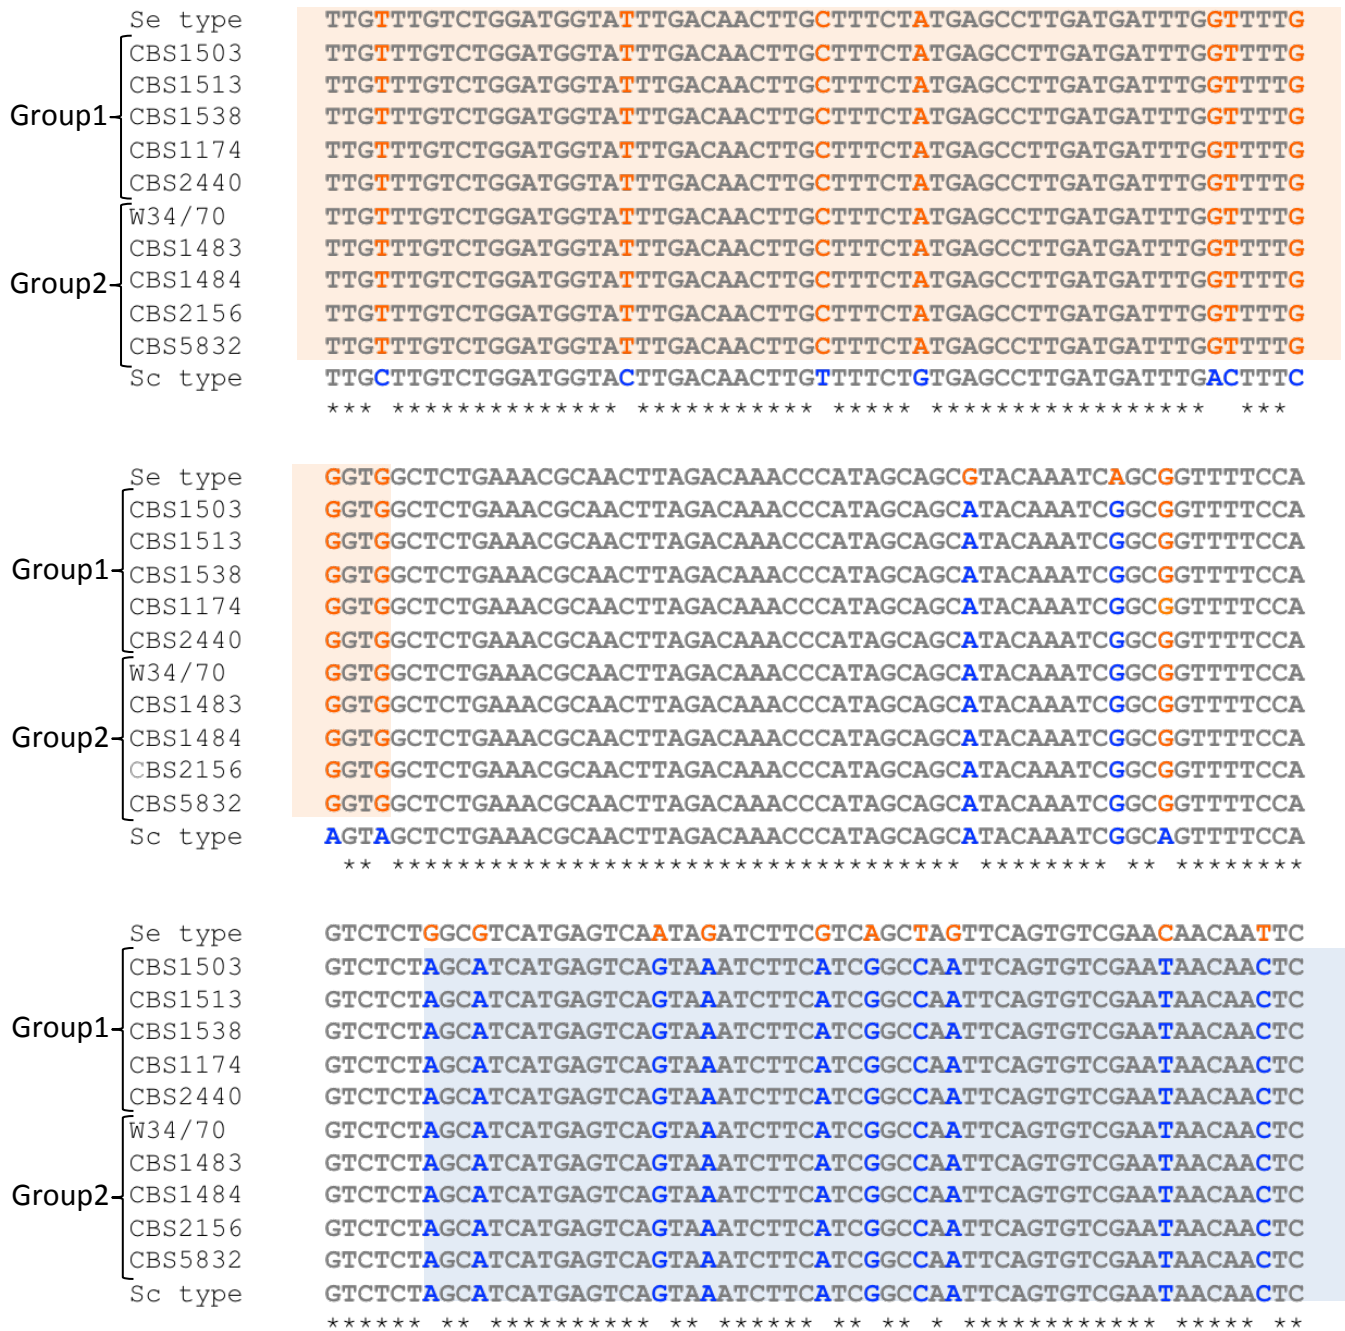

**Supplemental Figure 2. Multiple sequence alignment of 10 *S. pastorianus* strains surrounding the novel discovered breakpoint (ZU01 locus)**

Multiple sequence alignments of 10 *S. pastorianus* strains and the parental species *S. cerevisiae* (Sc type) and *S. eubayanus* (Se type) surrounding the breakpoint regions are shown. Blue characters (SNPs) indicate Sc type sequence and orange characters indicate Se type. According to the distribution of SNPs, blue background region is implied to be derived from Sc type parent and orange background region is from Se type parent.

Chr.VIII:431,478..431,777 (PRP8)

```
Se_type      TGAAGACCTTTTCTGATACGCTCACGAAGAACATACAATGCTGGATTGGCCTTCATAATC
W34/70      TGAAGACCTTTTCTAATACGTTTCACGAAGGACATATAATGCTGGGTTAGCTTTCATAATT
Sc_type      TGAAGACCTTTTCTAATACGTTTCACGAAGGACATATAATGCTGGGTTAGCTTTCATAATT
***** ** * ***** ** * ***** ** * ***** ** * *****
```

```
Se_type      GTTTCATACTATTTTGTACCAAGAGTTTTAATCCGTCAAACCAATTACCATAAGCGTCG
W34/70      GTTTCATACTATTTTGTATCAAGGTTTTAATCCGTTGAACCAATTACCATAGGCATCA
Sc_type      GTTTCATACTATTTTGTATCAAGGTTTTAATCCGTTGAACCAATTACCATAGGCATCA
***** ** * ***** ** * ***** ** * ***** ** * *****
```

```
Se_type      TACATATTGTAGGCCAGATCGATACCAATCATAACACCAAGTTGGTGAGGGATACATGCTG
W34/70      TACATGTTATAAGCCAGATCGATACCAATCATAACACCAAGTTGGTGAGGGATACATGCTG
Sc_type      TACATGTTATAAGCCAAATCGATACCGATCATAACACCTGTTGGGGAGGGATACATGCTG
***** ** * ***** ** * ***** ** * ***** ** * *****
```

```
Se_type      ACGTTATCCGTTGTATAATCAAGAAATTTTGCCTCTCACATAACGAGATATATCGTGGGAA
W34/70      ACGTTATCCGTTGTATAATCAAGAAATTTTGCCTCTCACATAACGAGATATATCGTGGGAA
Sc_type      ACATTATCTGTTGTATAATCGAGGAATTTTGCCTCTCACATAACGAGATATATCATGAGAA
** ***** ***** ** * ***** ***** ***** ** * *****
```

```
Se_type      TCGTAATCACCATATCTCAATTGCACATCAAACCACATCTTATTGGTAACCACATCCTTG
W34/70      TCGTAATCACCATATCTCAATTGCACATCAAACCACATCTTATTGGTAACCACATCCTTG
Sc_type      TCATAATCACCATATCTCAATTGTACATCAAACCACATTTTGGTTGGTAATCAATCCCTTA
** ***** ***** ***** ***** ** ***** ** *****
```

**Supplemental Figure 3. Sequence alignments surrounding the novel discovered breakpoint in W34/70 (PRP8 locus)**  
Multiple sequence alignments of W34/70 and the parental species *S. cerevisiae* (Sc type) and *S. eubayanus* (Se type) surrounding the breakpoint regions are shown. Blue characters (SNPs) indicate Sc type sequence and orange characters indicate Se type. According to the distribution of SNPs, blue background region is implied to be derived from Sc type parent and orange background region is from Se type parent.

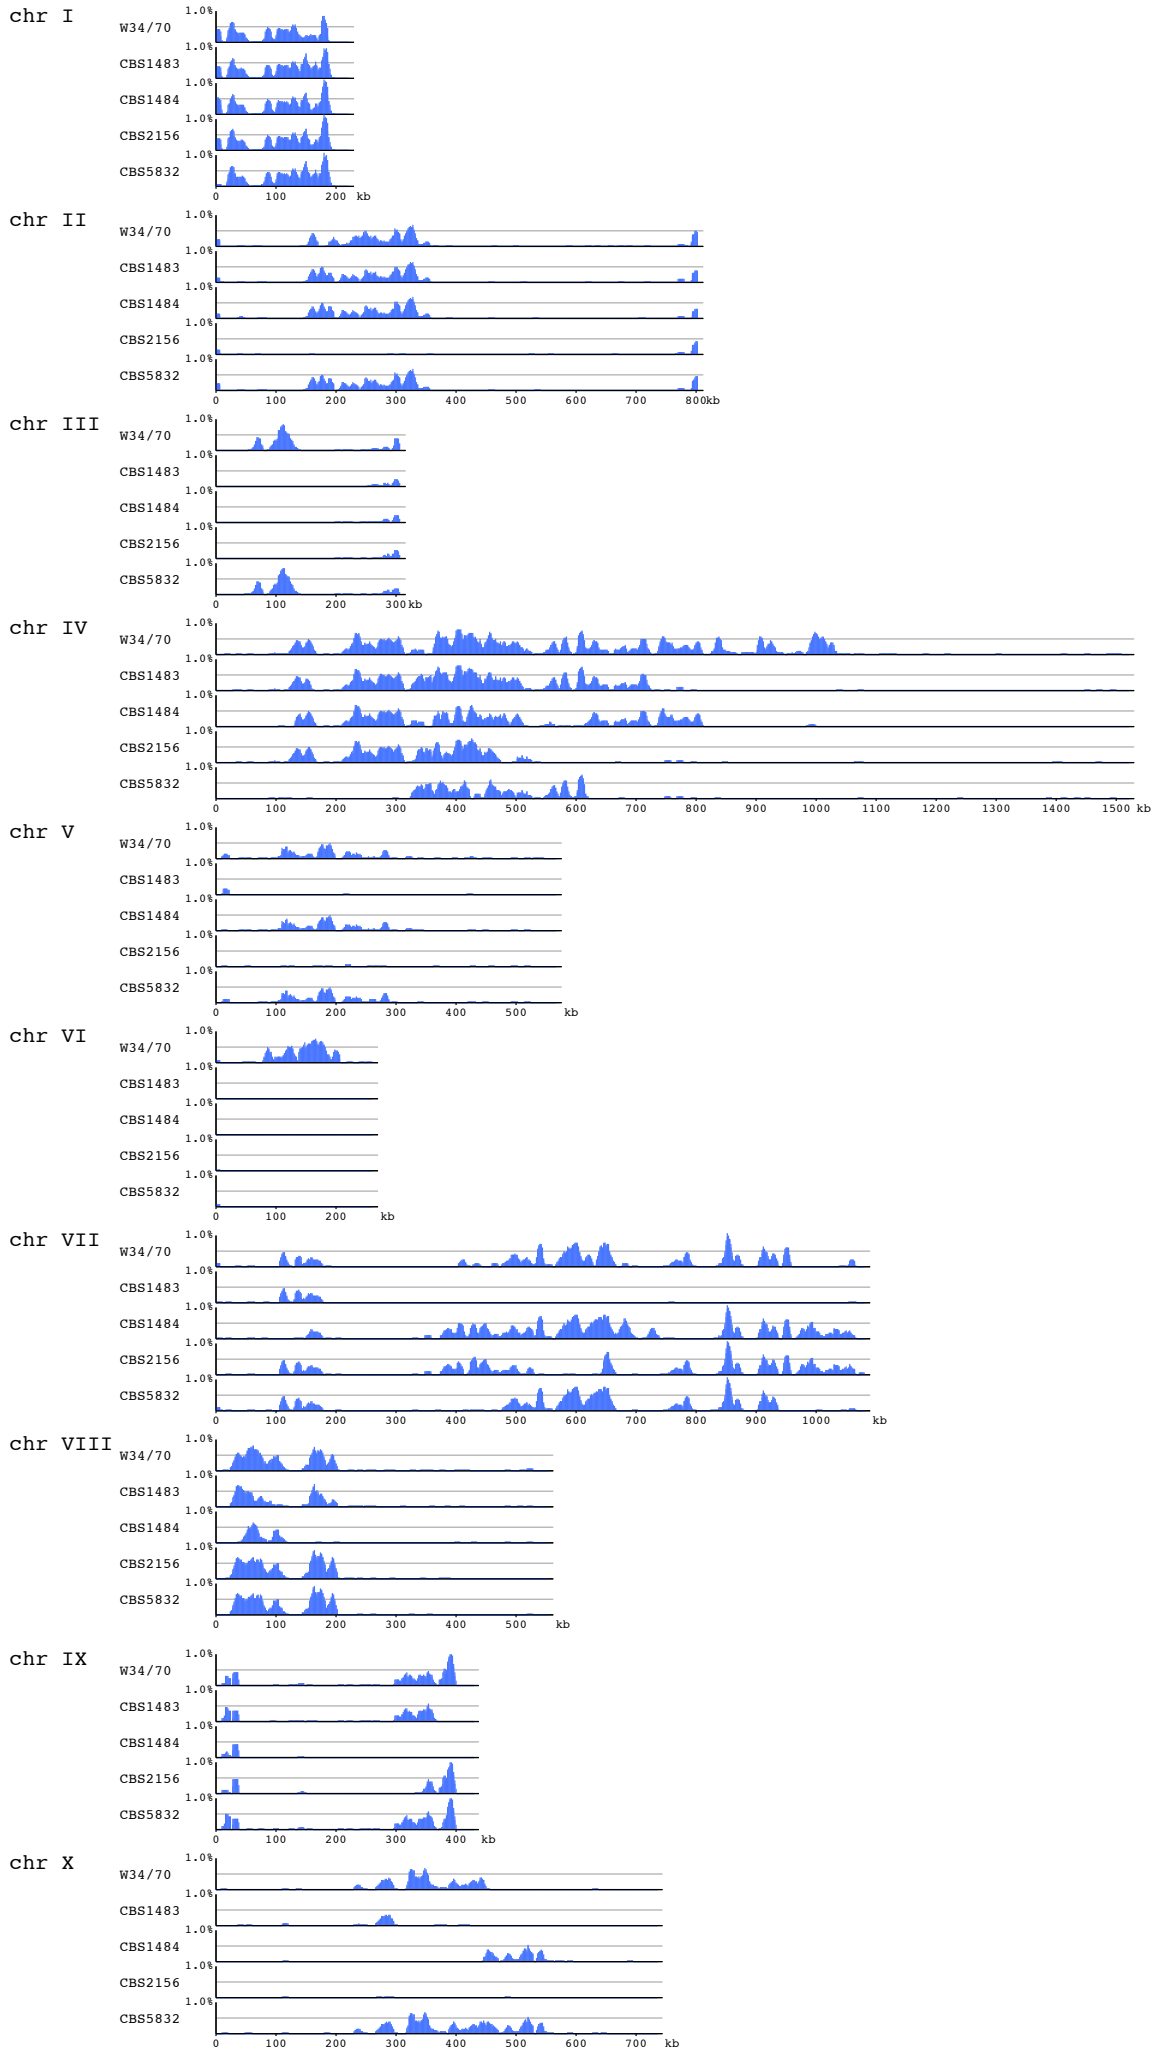



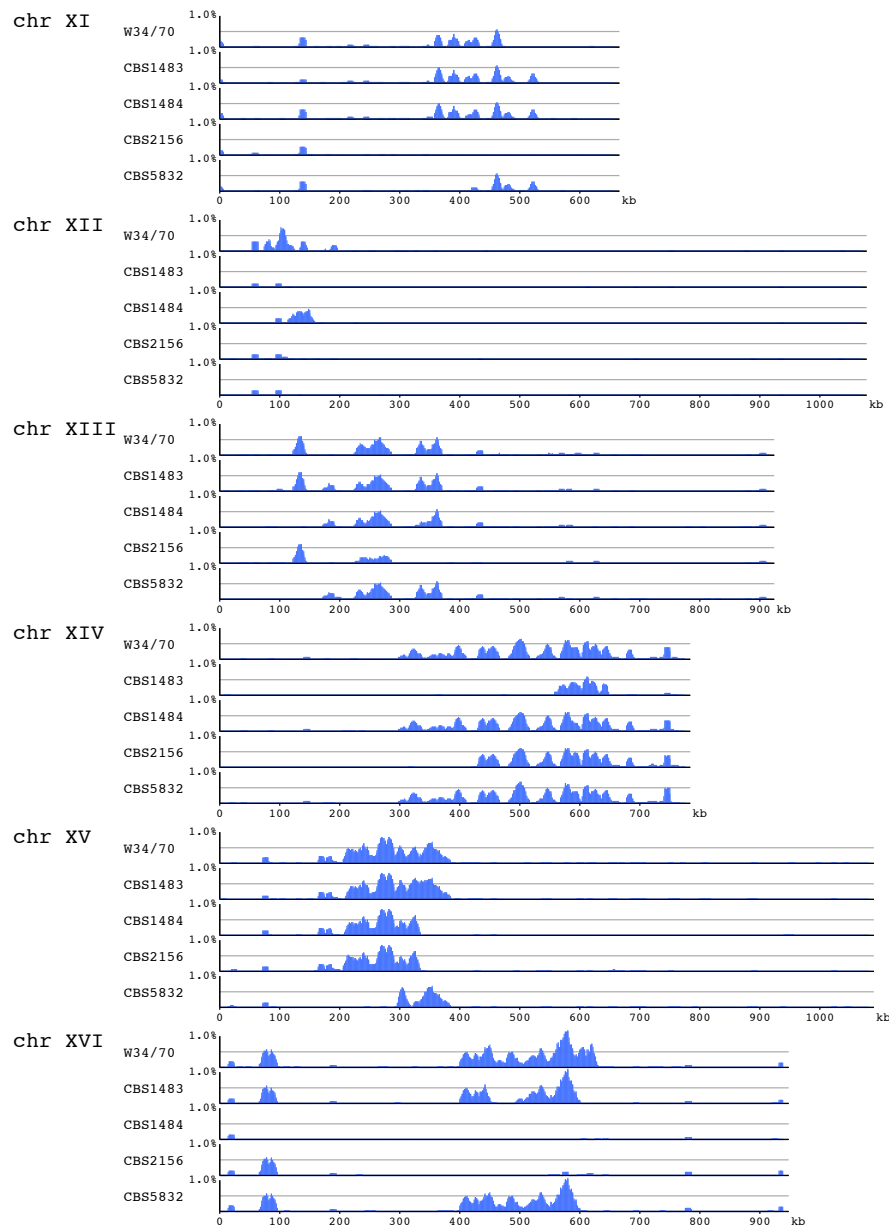

### Supplementary Figure 4. Distribution of hetero SNVs in Sc type chromosome of Group 2 strains

Distribution of heterozygosity along with Sc type chromosomes in five Group 2 strains (CBS1483, CBS1484, CBS2156, CBS5832 and W34/70, from the top in each chromosome) were shown by calculating moving average of SNVs density (window size 10 kbp and step size 1 kbp). Hetero SNVs are distributed unevenly and it might be due to LOH. In many of regions, low/none heterozygosity are observed in all 5 strains, but in some regions, the distribution patterns of low/none heterozygosity regions are different between them. So, LOH is considered the relatively occurring events and common low/none heterozygosity regions were shaped in the common ancestor or as a result of overlapping LOH events.

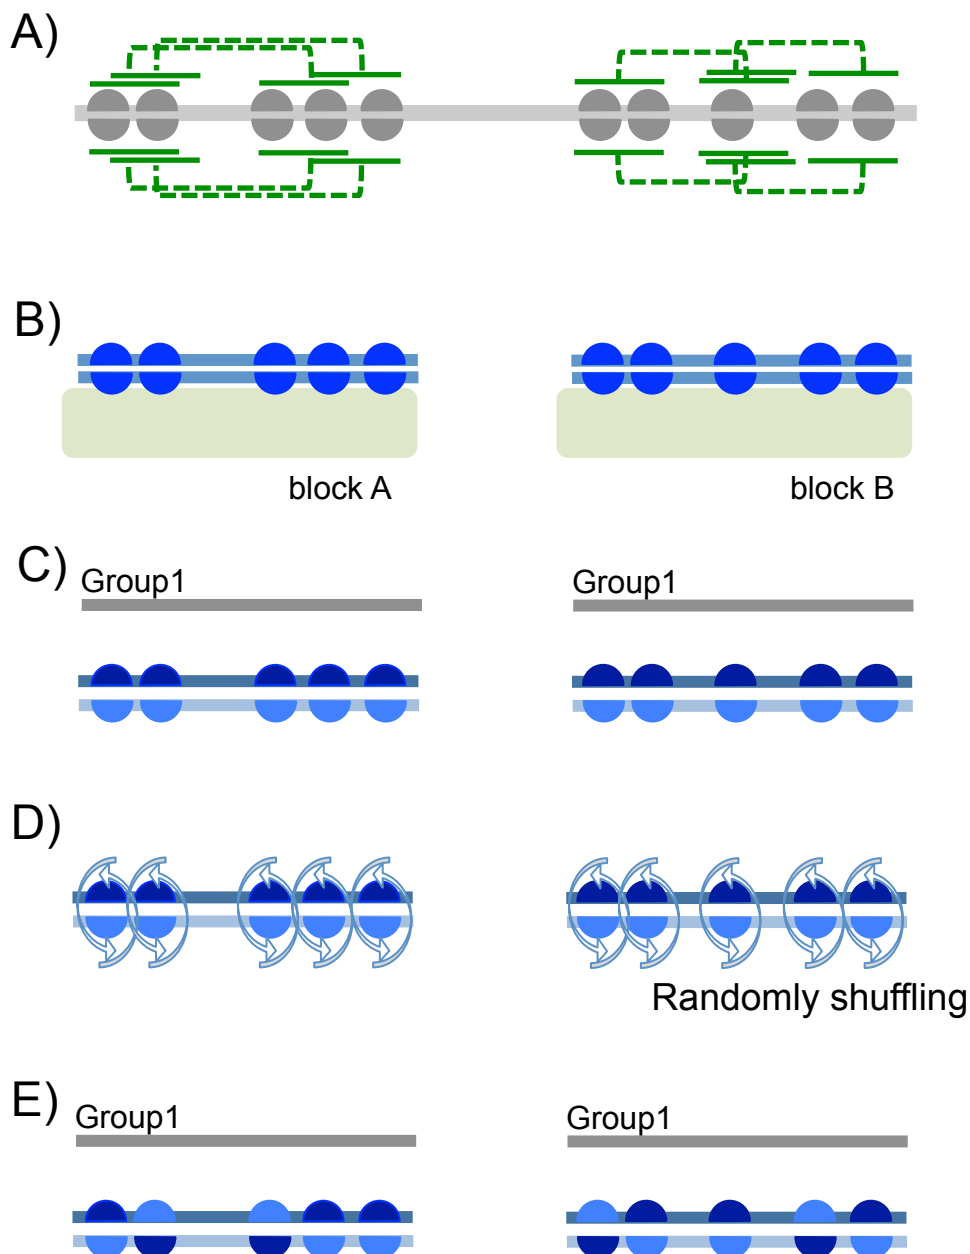

**Supplementary Figure 5. Schematic view of making haplotype phased blocks and “random shuffling” test**

- A) linkage information between adjacent hetero SNVs using paired-end or mate-pair reads
- B) according to solved linkage information, haplotype phased blocks were built. In each block, all the including hetero SNVs are separated with linkage information. 2 haplotype phased chromosomes were obtained.
- C) comparing with Group 1 sequences, haplotype phased chromosomes were divided (\_a : similar with Group 1, \_b: another chromosomes)
- D) schematic view of random shuffling test. allele sequences are randomly shuffled dropping off the linkage information
- E) as mentioned in C), 2 haplotype phased chromosomes with randomly shuffled alleles were divided according to similarity with Group 1

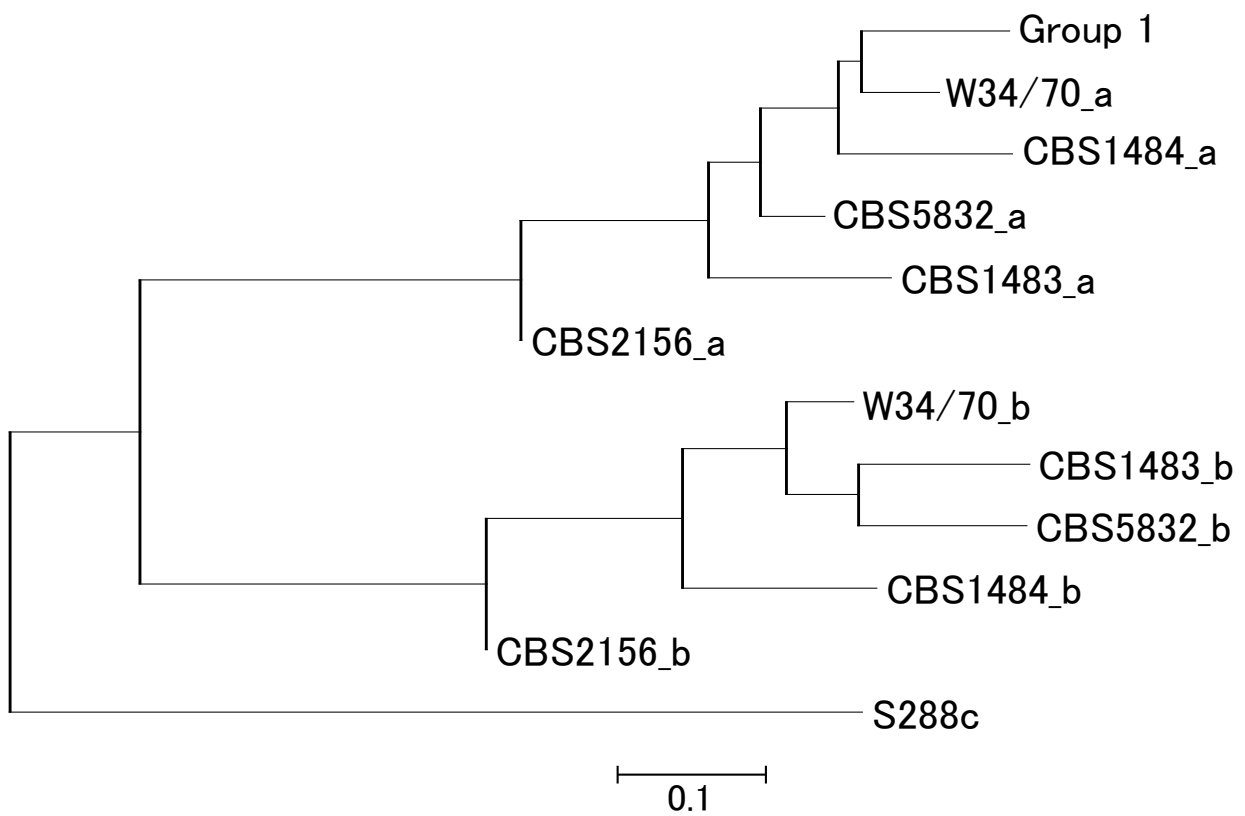

**Supplementary Figure 6. Phylogenetic tree haplotype phased Group 2 sequences and Group 1 consensus sequences**



A)

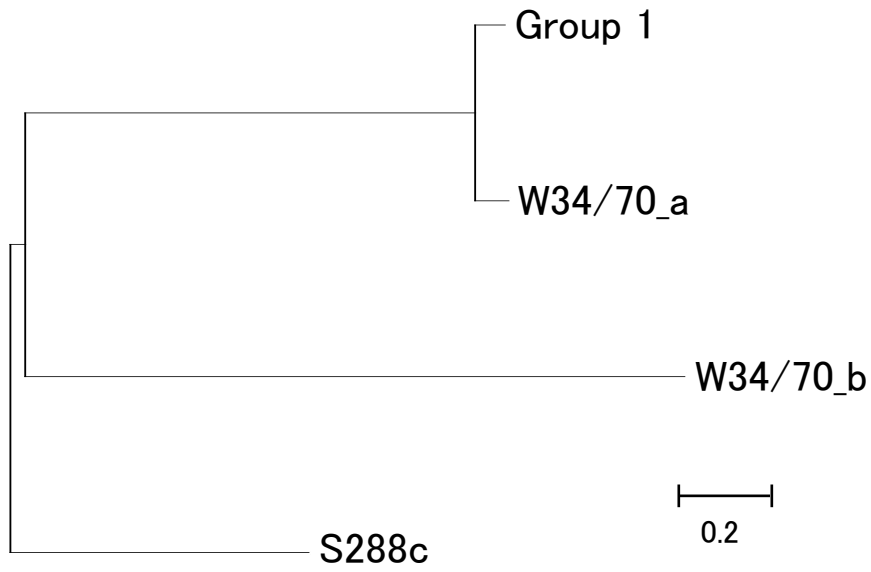

B)

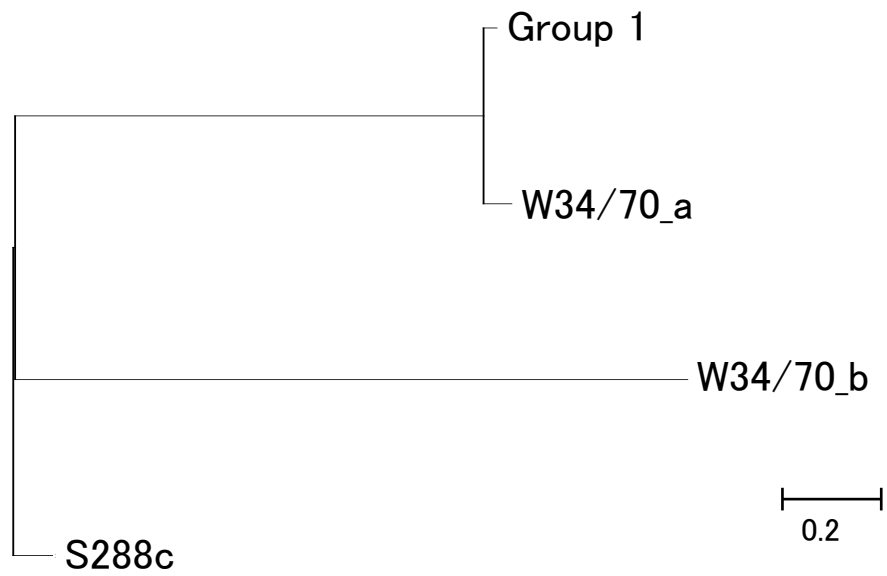

**Supplementary Figure 7. Phylogenetic tree based on haplotype phased W34/70 sequences and Group 1 sequences**

A) Threshold length = 1000 bp B) Threshold length = 300 bp.

If the distance between adjacent SNV loci exceeded the threshold, the blocks were divided.

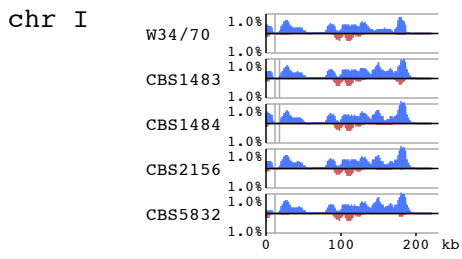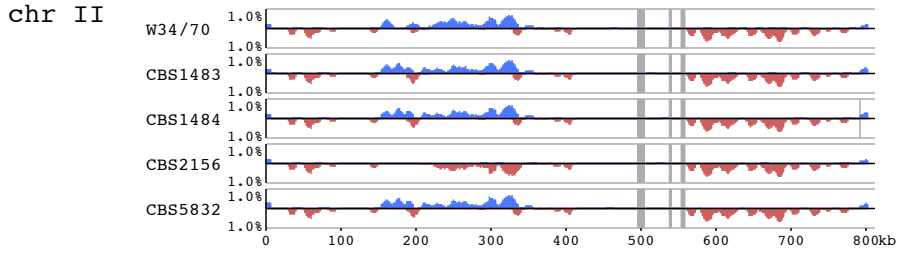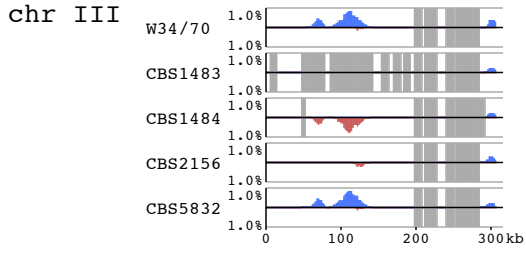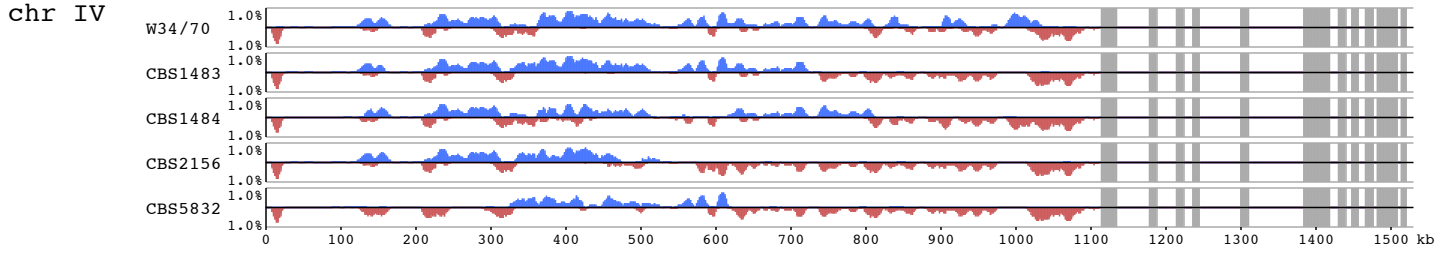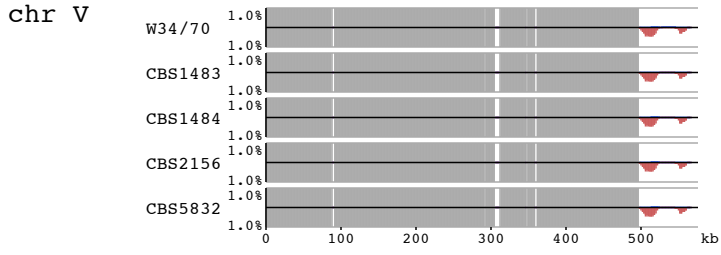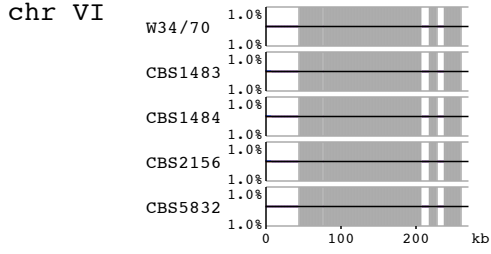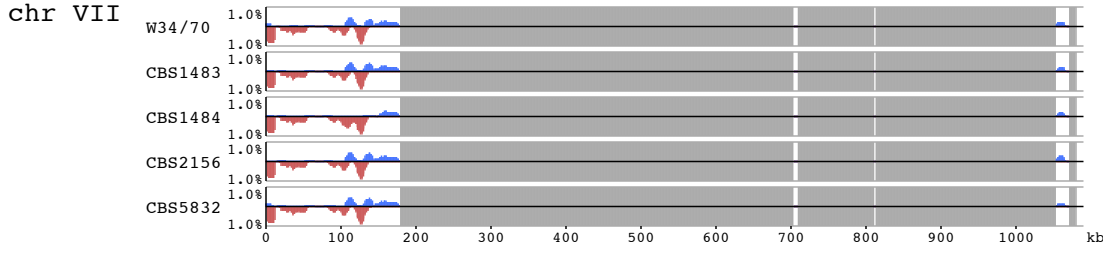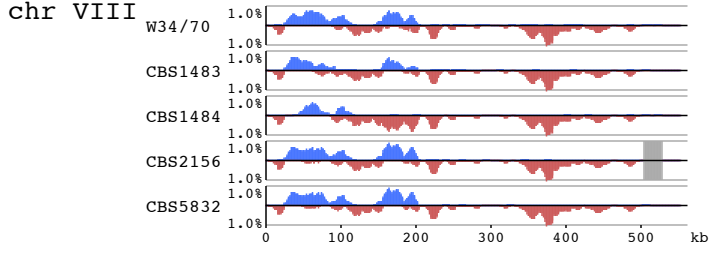

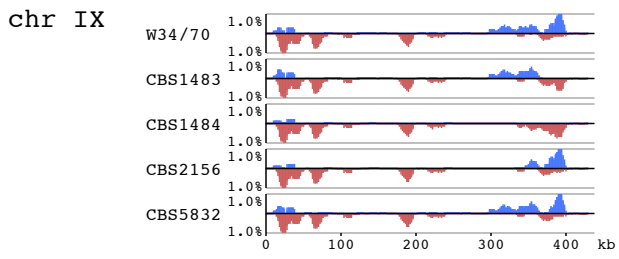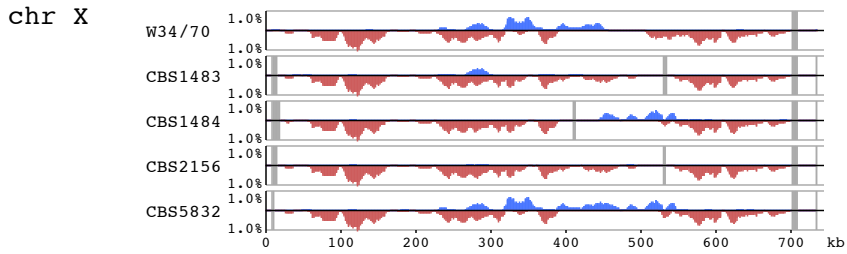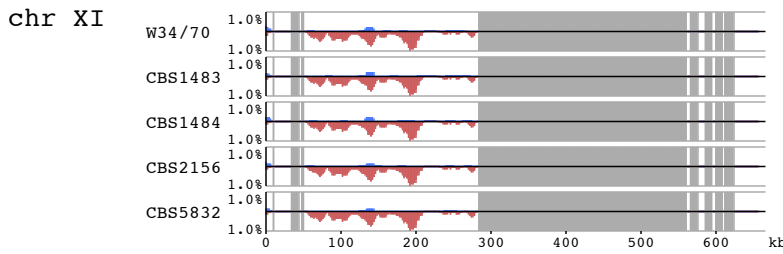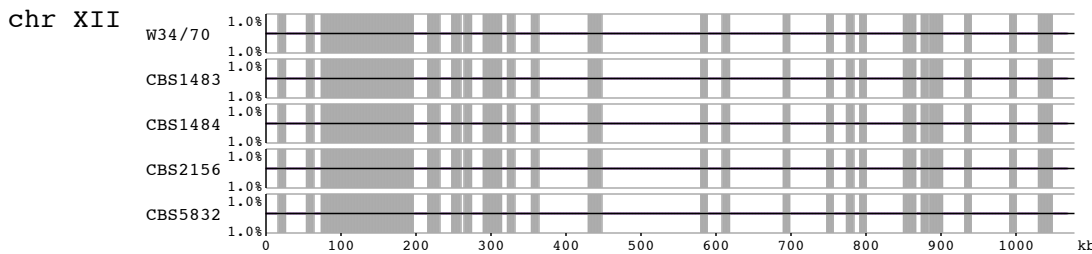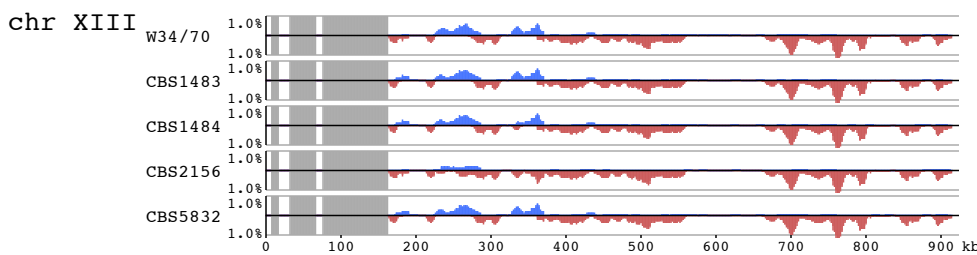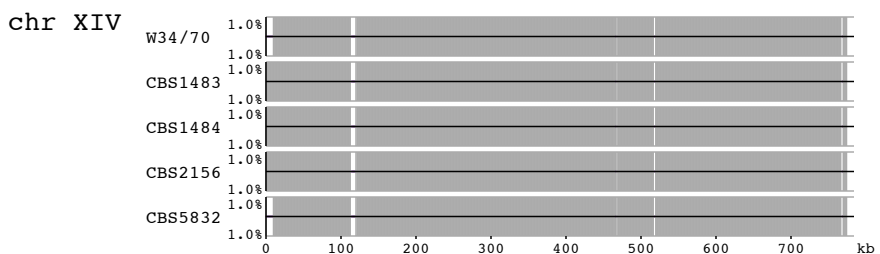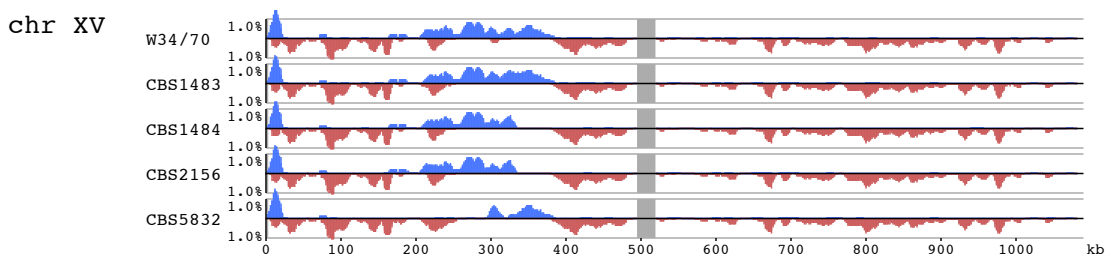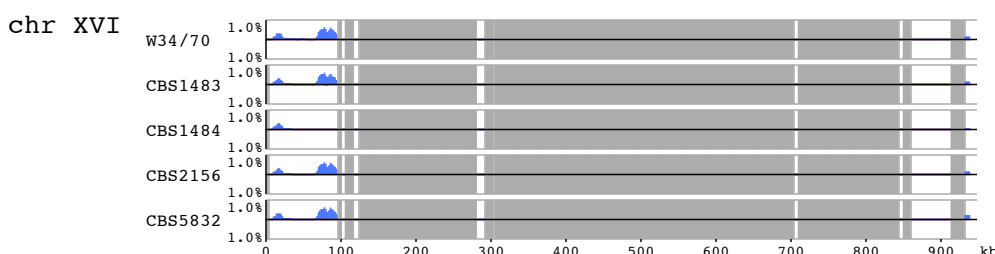

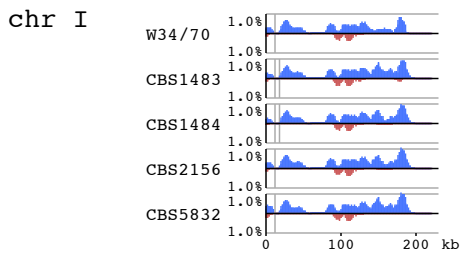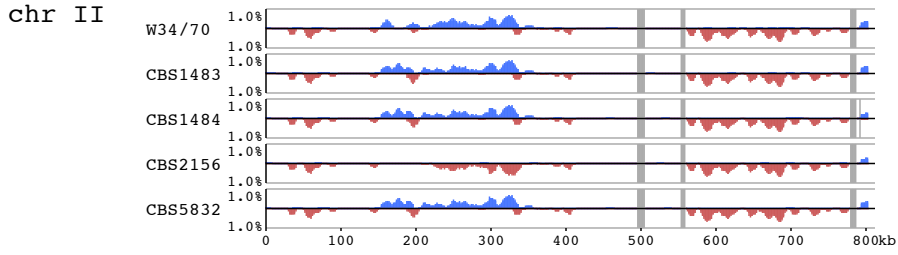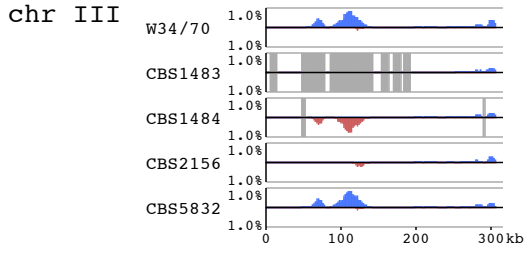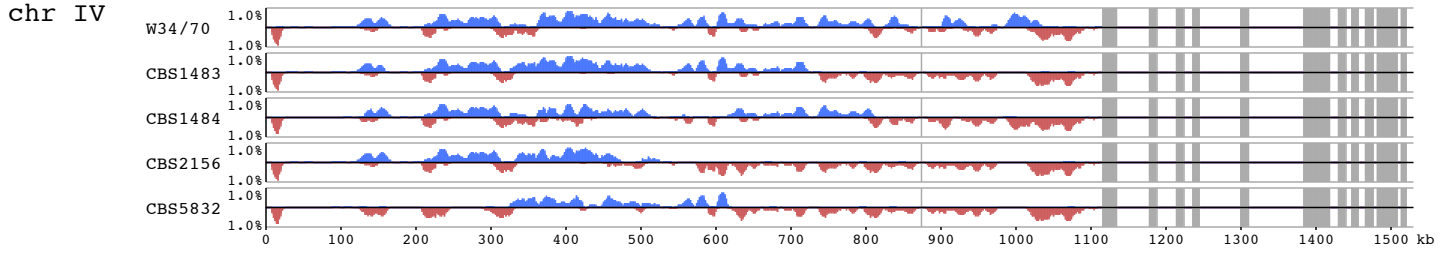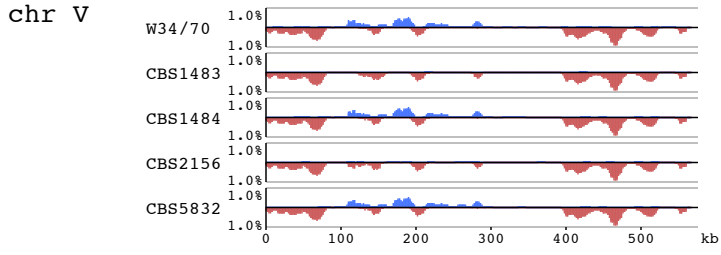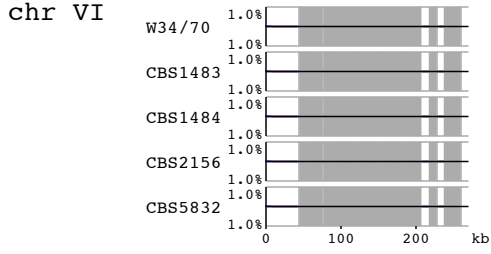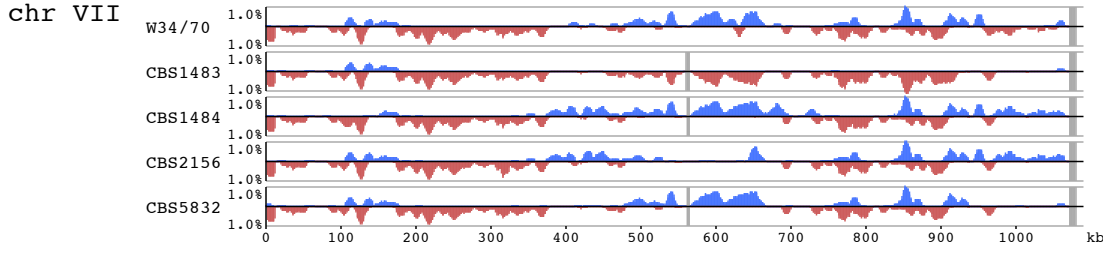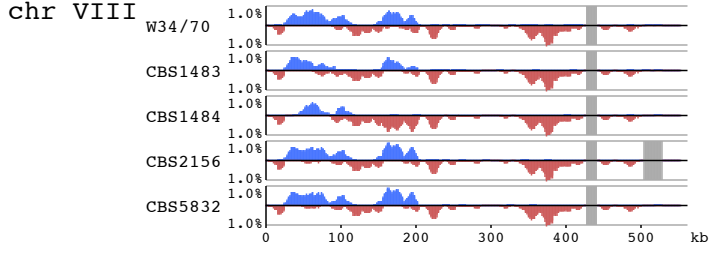

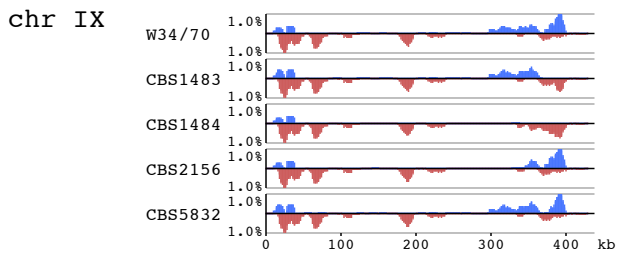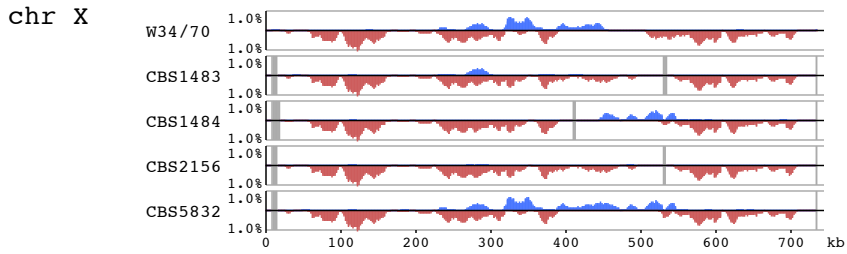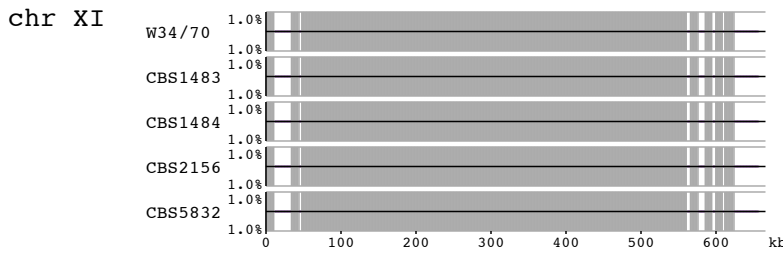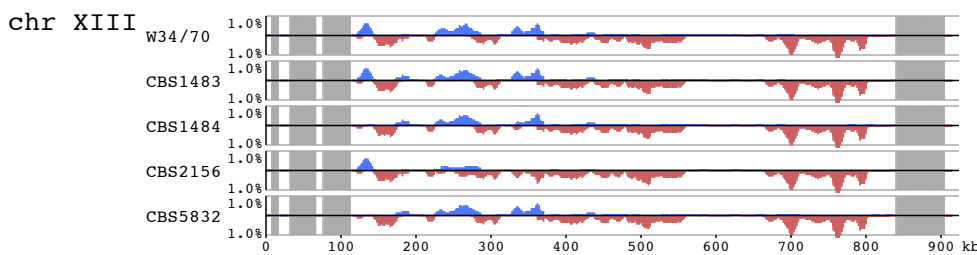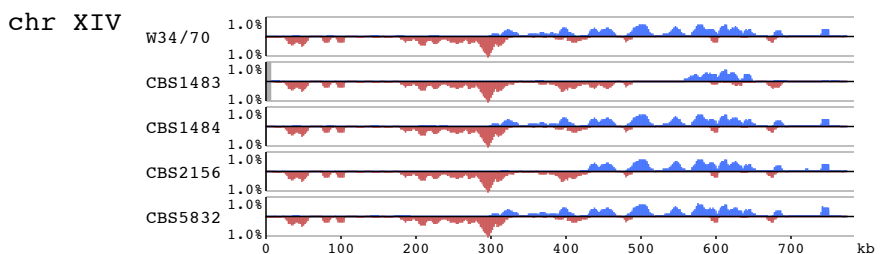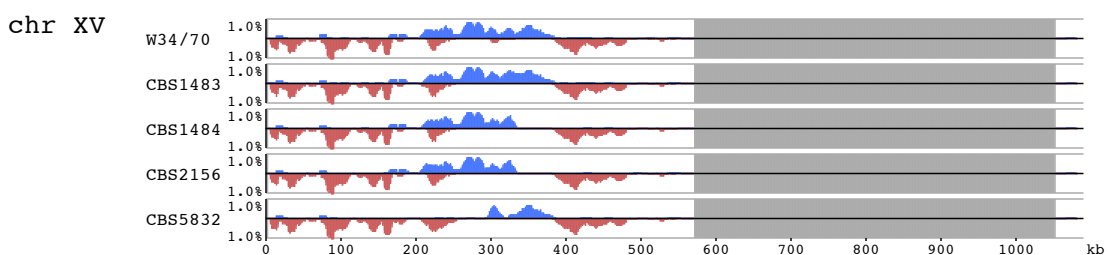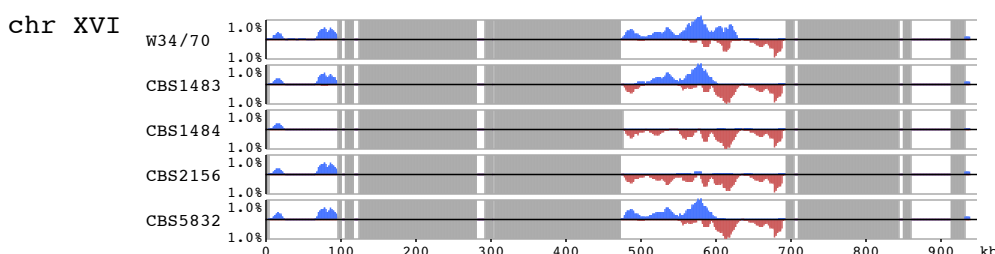

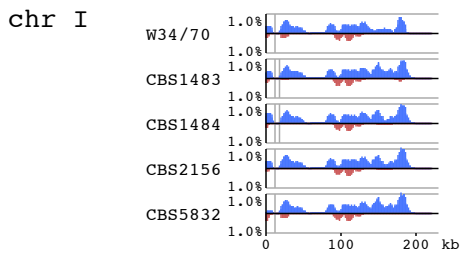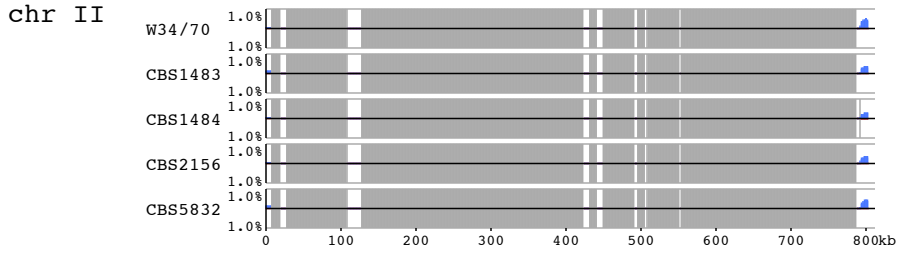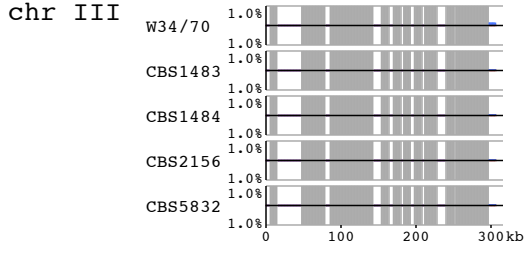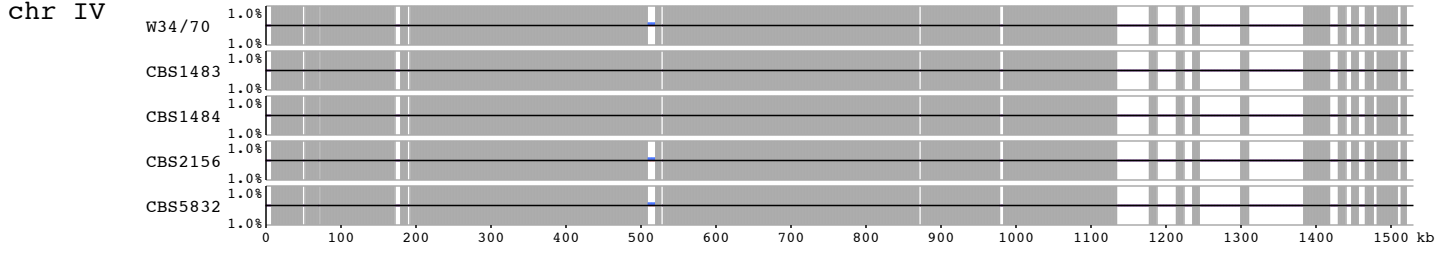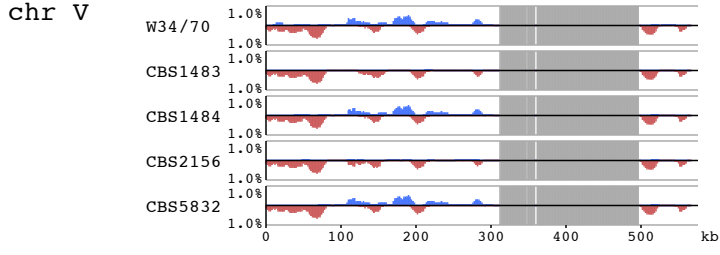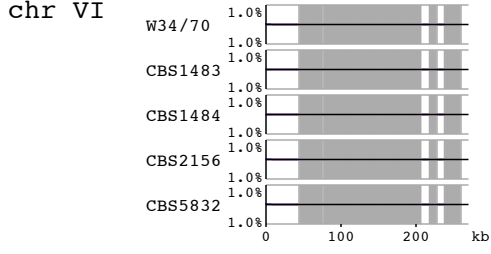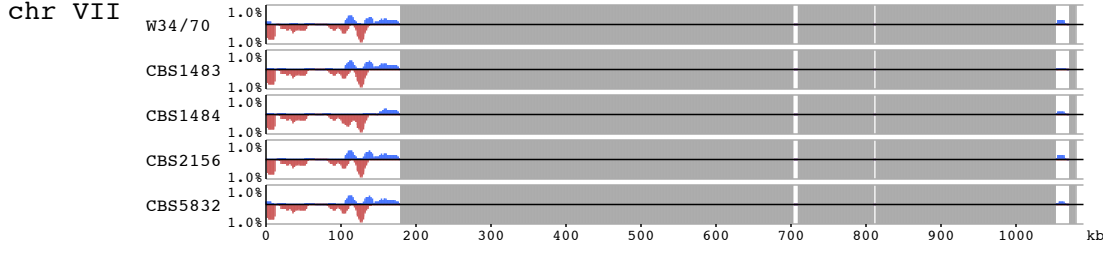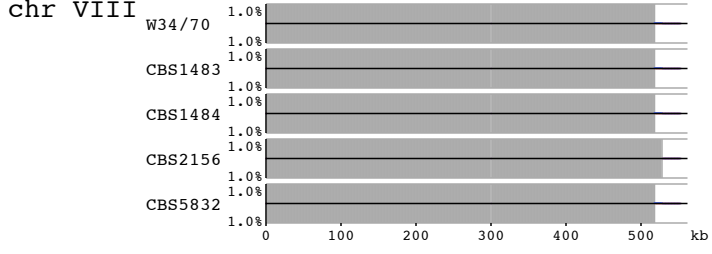



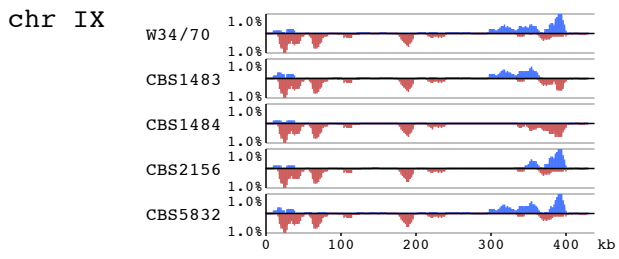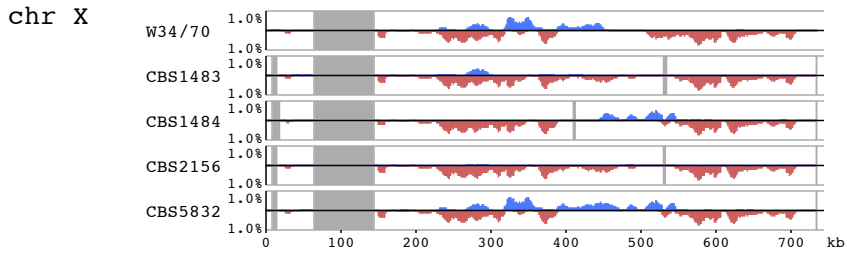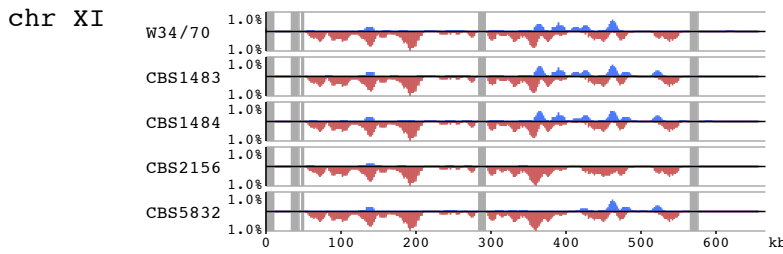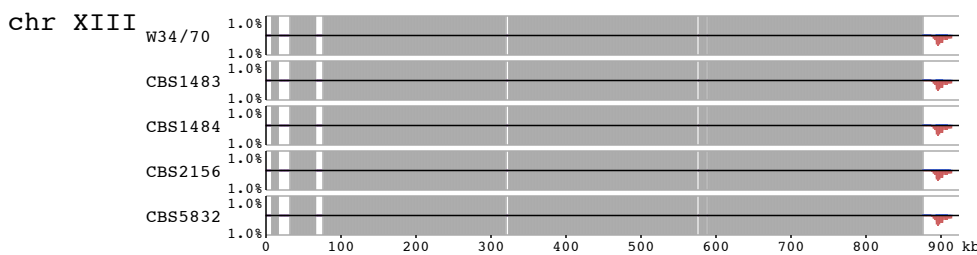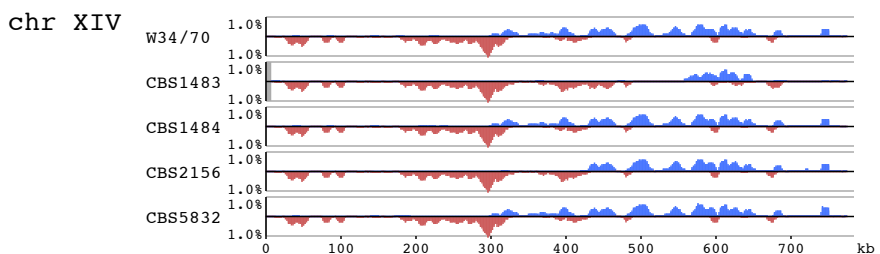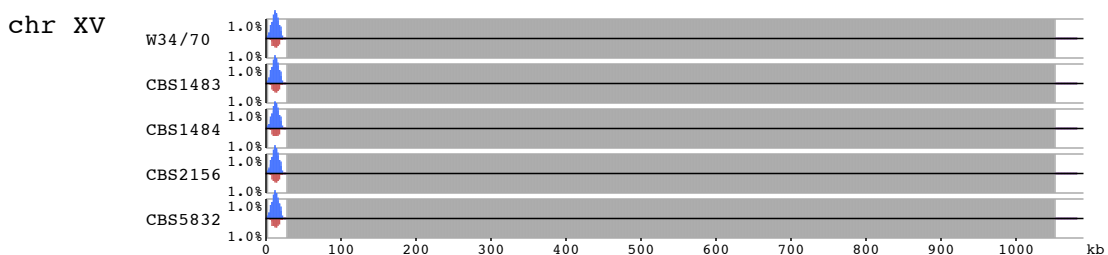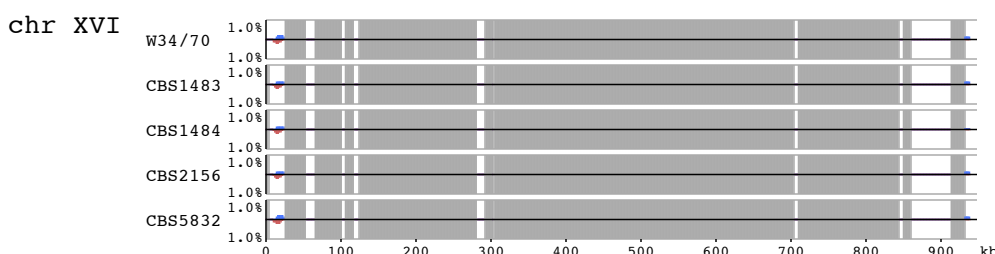

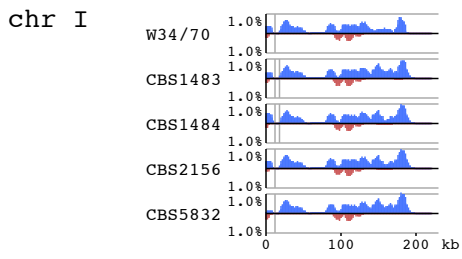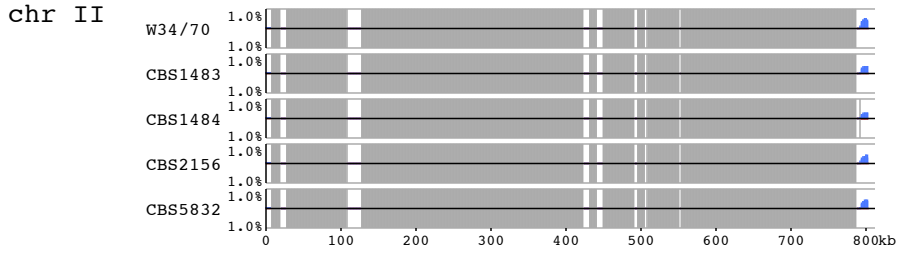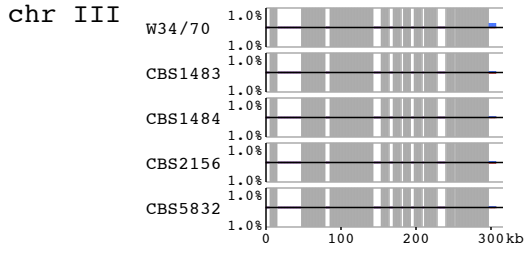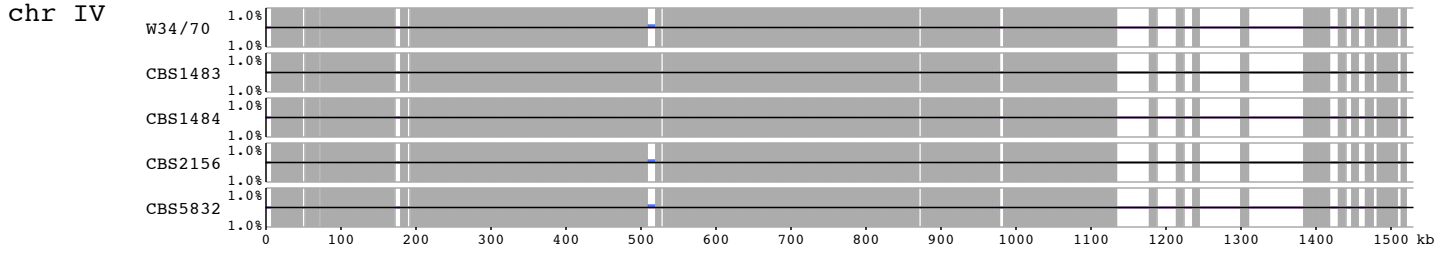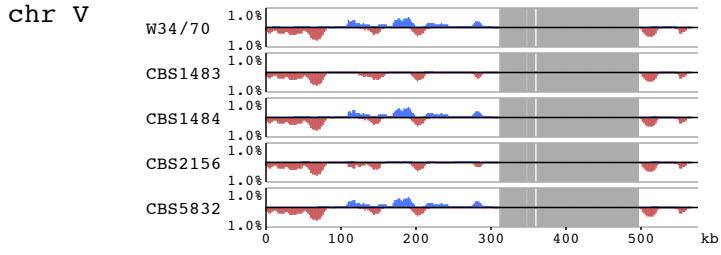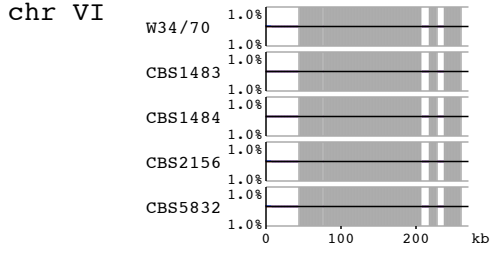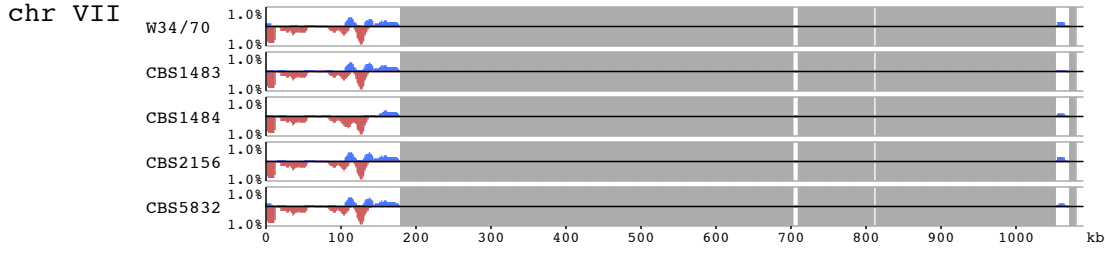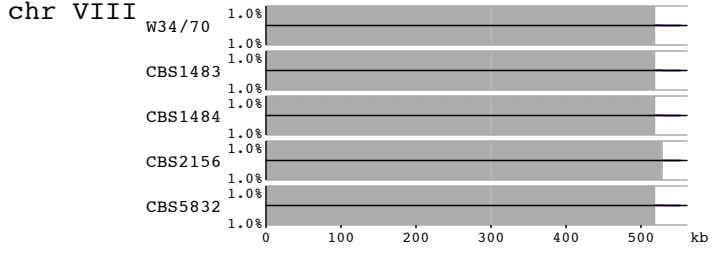

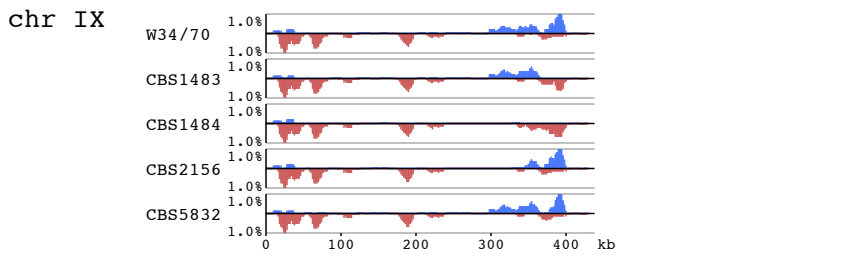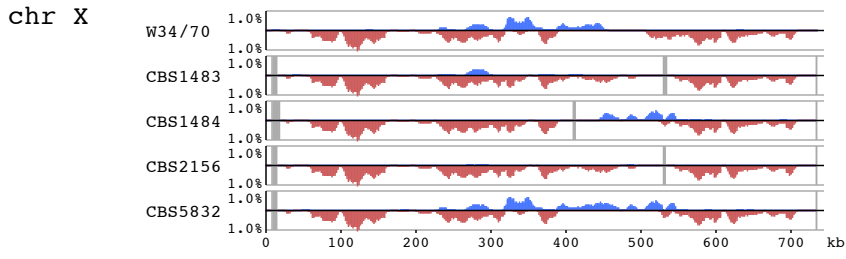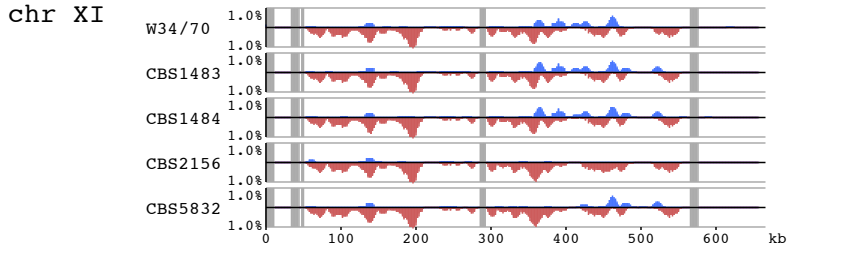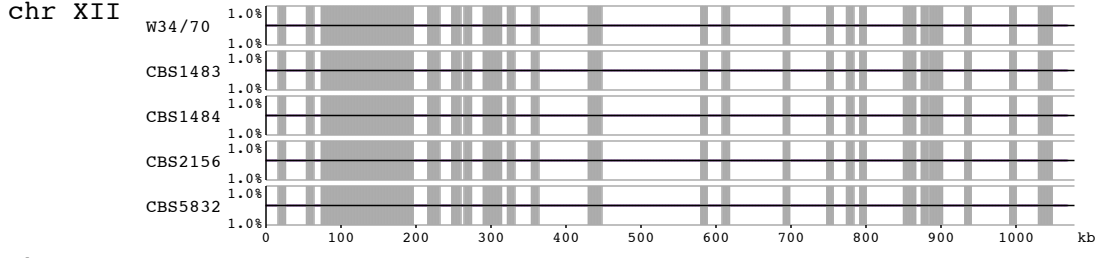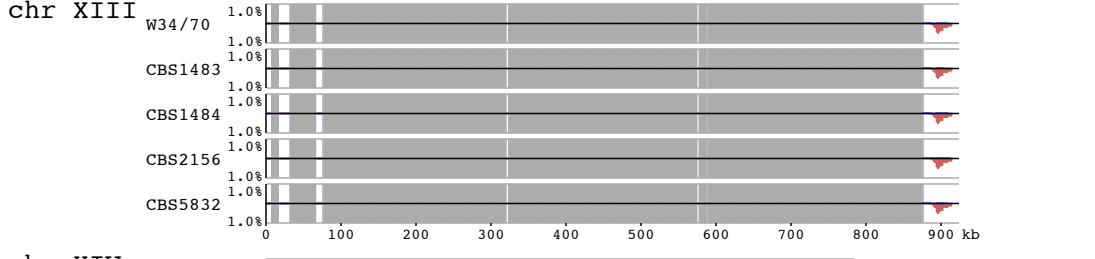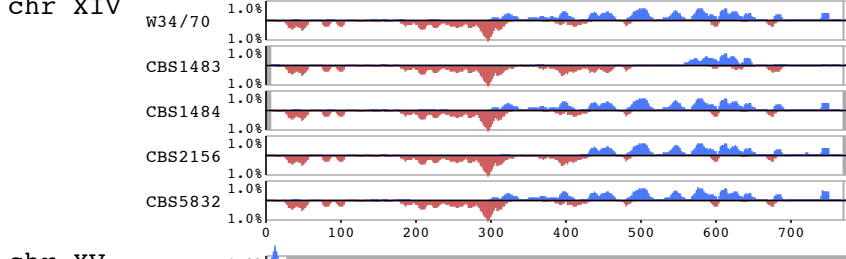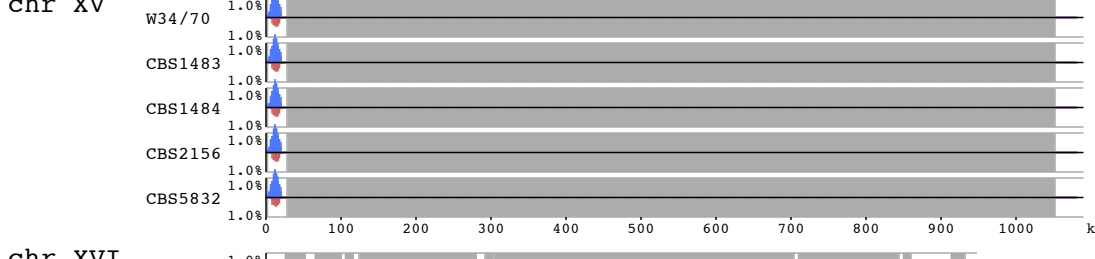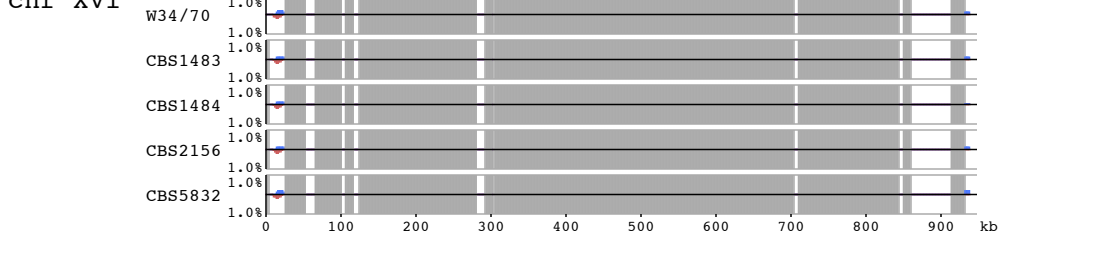

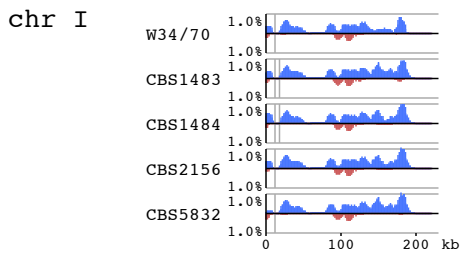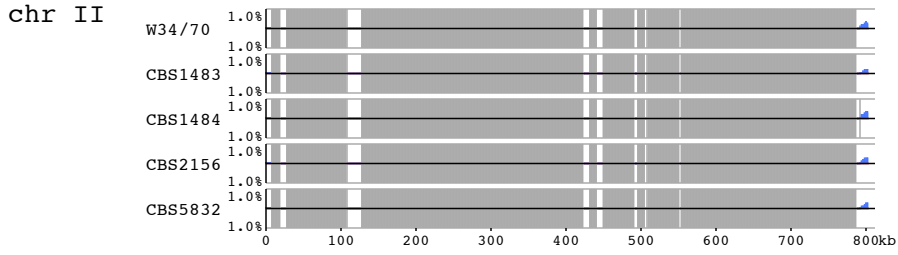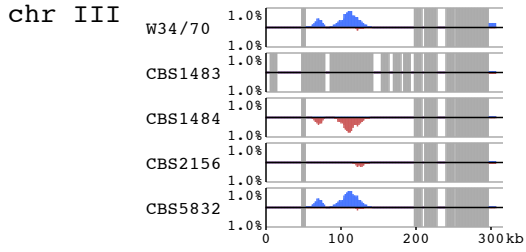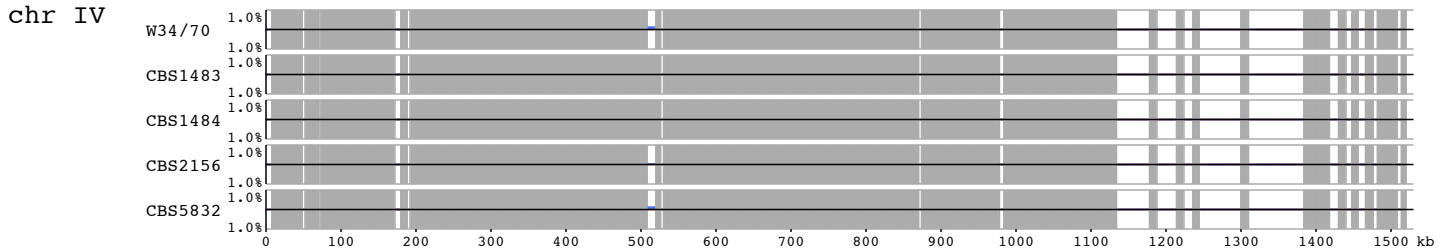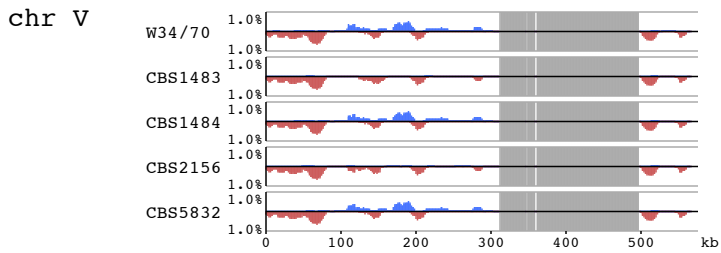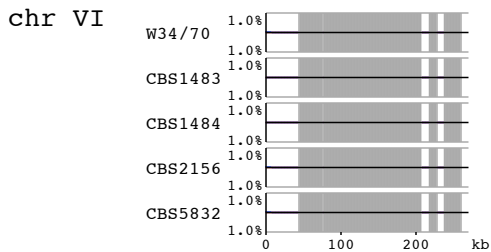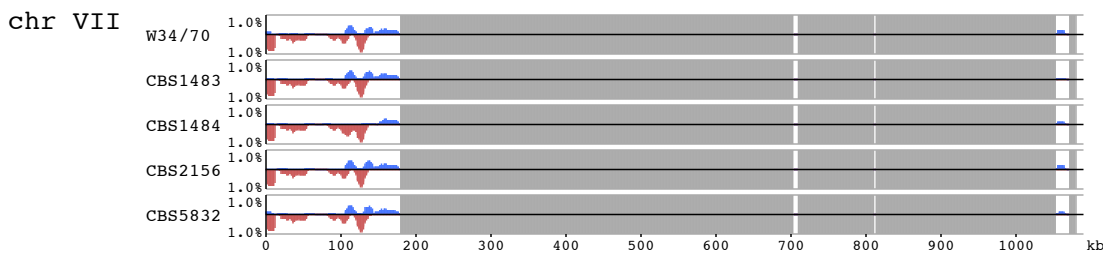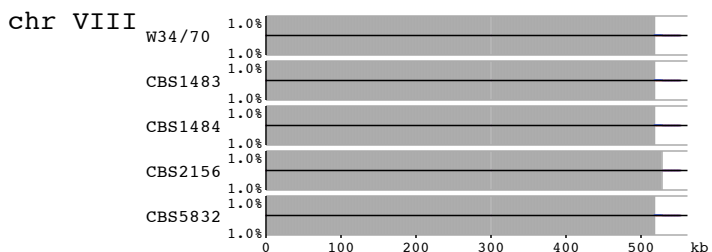

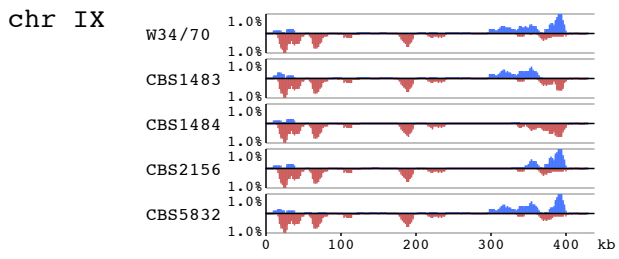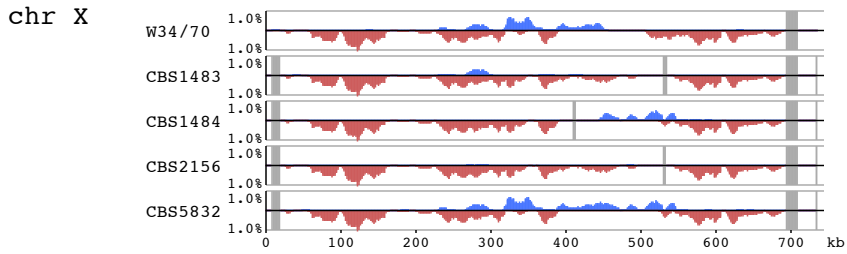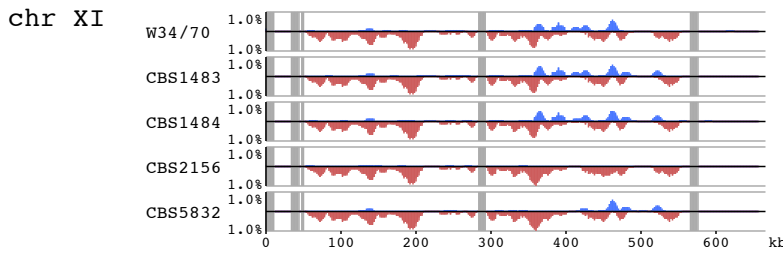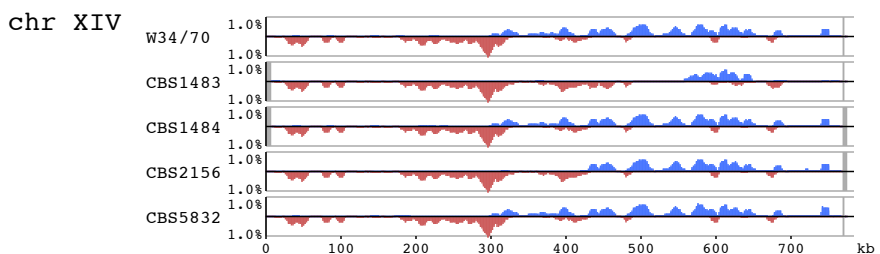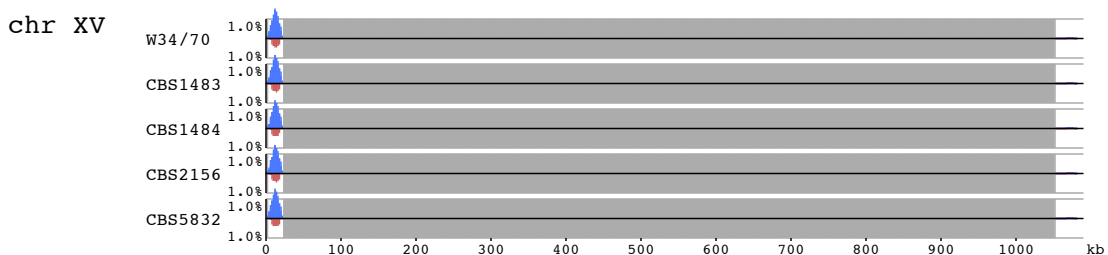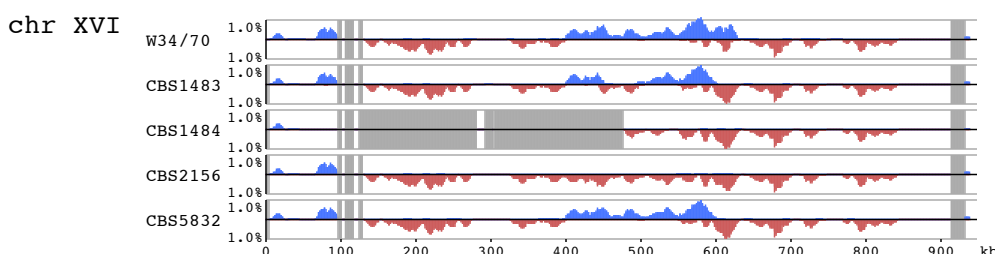

**Supplementary Figure 8. Distribution of hetero and homo SNVs between Group 1 and 2 strains.**

Blue (upper) and red (lower) lines indicate the distribution of hetero and homo SNVs, respectively, between Group 1 and 2 strains. Grey regions indicate chromosome deletion in either Group 1 or 2. Hetero SNVs, homo SNV regions, and regions with no SNVs co-segregated as continuous blocks, possibly as a result of LOH in these regions.



A)

|         |        | positions in S288C chromosome X |         |         |                 |
|---------|--------|---------------------------------|---------|---------|-----------------|
| strains |        | 435,102                         | 435,236 | 435,254 | CBS strain name |
| Group 1 | GSY509 | A                               | A       | T       | CBS2440         |
|         | GSY133 | A                               | A       | T       |                 |
|         | GSY501 | A                               | A       | T       | CBS1174         |
|         | GSY131 | A                               | A       | T       | CBS1538         |
|         | GSY137 | A                               | A       | T       |                 |
|         | GSY129 | A                               | A       | T       | CBS1513         |
|         | GSY134 | A                               | A       | T       | CBS1503         |
| Group 2 | GSY132 | T                               | T       | A       |                 |
|         | GSY138 | T                               | T       | A       |                 |
|         | GSY139 | T                               | T       | A       |                 |
|         | GSY135 | T                               | T       | A       |                 |
|         | GSY136 | T                               | T       | A       |                 |
|         | GSY516 | T                               | T       | A       |                 |
|         | GSY515 | T                               | T       | A       | CBS5832         |
|         | GSY503 | T                               | T       | A       | CBS1483         |
|         | GSY504 | A                               | A       | T       | CBS1484         |
|         | GSY508 | T                               | T       | A       | CBS2156         |
|         | S288C  | T                               | A       | A       |                 |

B)

|         |         | positions in S288C chromosome X |         |         |
|---------|---------|---------------------------------|---------|---------|
| strains |         | 435,102                         | 435,236 | 435,254 |
| Group 1 | CBS1503 | A                               | A       | T       |
|         | CBS1513 | A                               | A       | T       |
|         | CBS1538 | A                               | A       | T       |
|         | CBS1174 | A                               | A       | T       |
|         | CBS2440 | A                               | A       | T       |
| Group 2 | W34/70  | T,A                             | A,T     | A,T     |
|         | CBS1483 | T                               | T       | A       |
|         | CBS1484 | T                               | T       | A       |
|         | CBS2156 | A                               | A       | T       |
|         | CBS5832 | T,A                             | A,T     | A,T     |
| S288C   | T       | A                               | A       |         |

**Supplementary Figure 9. Re-analysis of previously reported SNV sites.**

A) Data are from previous report; B) NGS data from this study. In the *PRE3* region, W34/70 shows hetero SNVs consistent with two homo SNVs. CBS5832 shows the same hetero SNVs, whereas in previous report, CBS5832 showed only homo SNVs. The minor allele frequency at these sites was about 1/3, implying that one of three homologous chromosomes may have a different allele; these minor alleles may have been overlooked in the previous analysis.

CBS1503 AACACCGATCATTTTTGATGATTTGGCGTTTTTGTATATGATAGATTTCTTTTGAATT  
CBS1513 AACACCGATCATTTTTGATGATTTGGCGTTTTTGTATATGATAGATTTCTTTTGAATT  
CBS1538 AACACCGATCATTTTTGATGATTTGGCGTTTTTGTATATGATAGATTTCTTTTGAATT  
CBS1174 AACACCGATCATTTTTGATGATTTGGCGTTTTTGTATATGATAGATTTCTTTTGAATT  
CBS2440 AACACCGATCATTTTTGATGATTTGGCGTTTTTGTATATGATAGATTTCTTTTGAATT  
W34/70 AACACCGATCATTTTTGATGATTTGGCGTTTTTGTATATGATAGATTTCTTTTGAATT  
CBS1483 AACACCGATCATTTTTGATGATTTGGCGTTTTTGTATATGATAGATTTCTTTTGAATT  
CBS1484 AACACCGATCATTTTTGATGATTTGGCGTTTTTGTATATGATAGATTTCTTTTGAATT  
CBS2156 AACACCGATCATTTTTGATGATTTGGCGTTTTTGTATATGATAGATTTCTTTTGAATT  
CBS5832 AACACCGATCATTTTTGATGATTTGGCGTTTTTGTATATGATAGATTTCTTTTGAATT  
S288C 434950 AACACCGATCATTTTTGATGATTTGGCGTTTTTGTATATGATAGATTTCTTTTGAATT 435009  
\*\*\*\*\*

CBS1503 TTGTCATTTTCACTTTTCCACTCGCAACGGAATCCGGTGGCAAAAAGGAAAAGCATTG  
CBS1513 TTGTCATTTTCACTTTTCCACTCGCAACGGAATCCGGTGGCAAAAAGGAAAAGCATTG  
CBS1538 TTGTCATTTTCACTTTTCCACTCGCAACGGAATCCGGTGGCAAAAAGGAAAAGCATTG  
CBS1174 TTGTCATTTTCACTTTTCCACTCGCAACGGAATCCGGTGGCAAAAAGGAAAAGCATTG  
CBS2440 TTGTCATTTTCACTTTTCCACTCGCAACGGAATCCGGTGGCAAAAAGGAAAAGCATTG  
W34/70 TTGTCATTTTCACTTTTCCACTCGCAACGGAATCCGGTGGCAAAAAGGAAAAGCATTG  
CBS1483 TTGTCATTTTCACTTTTCCACTCGCAACGGAATCCGGTGGCAAAAAGGAAAAGCATTG  
CBS1484 TTGTCATTTTCACTTTTCCACTCGCAACGGAATCCGGTGGCAAAAAGGAAAAGCATTG  
CBS2156 TTGTCATTTTCACTTTTCCACTCGCAACGGAATCCGGTGGCAAAAAGGAAAAGCATTG  
CBS5832 TTGTCATTTTCACTTTTCCACTCGCAACGGAATCCGGTGGCAAAAAGGAAAAGCATTG  
S288C 435010 TTGTCATTTTCACTTTTCCACTCGCAACGGAATCCGGTGGCAAAAAGGAAAAGCATTG 435069  
\*\*\*\*\*

CBS1503 AAATGCAATCTTTAACAGTATTTTAAACAAGTAGCGAGACGGTGTACAATTACGATAAGA  
CBS1513 AAATGCAATCTTTAACAGTATTTTAAACAAGTAGCGAGACGGTGTACAATTACGATAAGA  
CBS1538 AAATGCAATCTTTAACAGTATTTTAAACAAGTAGCGAGACGGTGTACAATTACGATAAGA  
CBS1174 AAATGCAATCTTTAACAGTATTTTAAACAAGTAGCGAGACGGTGTACAATTACGATAAGA  
CBS2440 AAATGCAATCTTTAACAGTATTTTAAACAAGTAGCGAGACGGTGTACAATTACGATAAGA  
W34/70 AAATGCAATCTTTAACAGTATTTTAAACAAGTWGCGAGACGGTGTACAATTACGATAAGA  
CBS1483 AAATGCAATCTTTAACAGTATTTTAAACAAGTIGCGAGACGGTGTACAATTACGATAAGA  
CBS1484 AAATGCAATCTTTAACAGTATTTTAAACAAGTAGCGAGACGGTGTACAATTACGATAAGA  
CBS2156 AAATGCAATCTTTAACAGTATTTTAAACAAGTIGCGAGACGGTGTACAATTACGATAAGA  
CBS5832 AAATGCAATCTTTAACAGTATTTTAAACAAGTWGCGAGACGGTGTACAATTACGATAAGA  
S288C 435070 AAATGCAATCTTTAACAGTATTTTAAACAAGTIGCGAGACGGTGTACAATTACGATAAGA 435129  
\*\*\*\*\*

CBS1503 ATTGCTACTTCAAAGTACACACAGAAAGTTAACATGAATGGAATTC AAGTGGACATCAAT  
CBS1513 ATTGCTACTTCAAAGTACACACAGAAAGTTAACATGAATGGAATTC AAGTGGACATCAAT  
CBS1538 ATTGCTACTTCAAAGTACACACAGAAAGTTAACATGAATGGAATTC AAGTGGACATCAAT  
CBS1174 ATTGCTACTTCAAAGTACACACAGAAAGTTAACATGAATGGAATTC AAGTGGACATCAAT  
CBS2440 ATTGCTACTTCAAAGTACACACAGAAAGTTAACATGAATGGAATTC AAGTGGACATCAAT  
W34/70 ATTGCTACTTCAAAGTACACACAGAAAGTTAACATGAATGGAATTC AAGTGGACATCAAT  
CBS1483 ATTGCTACTTCAAAGTACACACAGAAAGTTAACATGAATGGAATTC AAGTGGACATCAAT  
CBS1484 ATTGCTACTTCAAAGTACACACAGAAAGTTAACATGAATGGAATTC AAGTGGACATCAAT  
CBS2156 ATTGCTACTTCAAAGTACACACAGAAAGTTAACATGAATGGAATTC AAGTGGACATCAAT  
CBS5832 ATTGCTACTTCAAAGTACACACAGAAAGTTAACATGAATGGAATTC AAGTGGACATCAAT  
S288C 435130 ATTGCTACTTCAAAGTACACACAGAAAGTTAACATGAATGGAATTC AAGTGGACATCAAT 435189  
\*\*\*\*\*

CBS1503 CGTTTGAAAAAGGGCGAAGTCAGTTTAGGTACCTCAATGTATGTATATAAGAATTTTCC  
CBS1513 CGTTTGAAAAAGGGCGAAGTCAGTTTAGGTACCTCAATGTATGTATATAAGAATTTTCC  
CBS1538 CGTTTGAAAAAGGGCGAAGTCAGTTTAGGTACCTCAATGTATGTATATAAGAATTTTCC  
CBS1174 CGTTTGAAAAAGGGCGAAGTCAGTTTAGGTACCTCAATGTATGTATATAAGAATTTTCC  
CBS2440 CGTTTGAAAAAGGGCGAAGTCAGTTTAGGTACCTCAATGTATGTATATAAGAATTTTCC  
W34/70 CGTTTGAAAAAGGGCGAAGTCAGTTTAGGTACCTCAATGTATGTATATAAGAATTTTCC  
CBS1483 CGTTTGAAAAAGGGCGAAGTCAGTTTAGGTACCTCAATGTATGTATATAAGAATTTTCC  
CBS1484 CGTTTGAAAAAGGGCGAAGTCAGTTTAGGTACCTCAATGTATGTATATAAGAATTTTCC  
CBS2156 CGTTTGAAAAAGGGCGAAGTCAGTTTAGGTACCTCAATGTATGTATATAAGAATTTTCC  
CBS5832 CGTTTGAAAAAGGGCGAAGTCAGTTTAGGTACCTCAATGTATGTATATAAGAATTTTCC  
S288C 435190 CGTTTGAAAAAGGGCGAAGTCAGTTTAGGTACCTCAATGTATGTATATAAGAATTTTCC 435249  
\*\*\*\*\*

CBS1503 TCCCCTTTATTGTTTCTAAAAGTTCAATGAAGTAAAGTCTCAATTGGCCTTATTACTAA  
CBS1513 TCCCCTTTATTGTTTCTAAAAGTTCAATGAAGTAAAGTCTCAATTGGCCTTATTACTAA  
CBS1538 TCCCCTTTATTGTTTCTAAAAGTTCAATGAAGTAAAGTCTCAATTGGCCTTATTACTAA  
CBS1174 TCCCCTTTATTGTTTCTAAAAGTTCAATGAAGTAAAGTCTCAATTGGCCTTATTACTAA  
CBS2440 TCCCCTTTATTGTTTCTAAAAGTTCAATGAAGTAAAGTCTCAATTGGCCTTATTACTAA  
W34/70 TCCCCTTTATTGTTTCTAAAAGTTCAATGAAGTAAAGTCTCAATTGGCCTTATTACTAA  
CBS1483 TCCCCTTTATTGTTTCTAAAAGTTCAATGAAGTAAAGTCTCAATTGGCCTTATTACTAA  
CBS1484 TCCCCTTTATTGTTTCTAAAAGTTCAATGAAGTAAAGTCTCAATTGGCCTTATTACTAA  
CBS2156 TCCCCTTTATTGTTTCTAAAAGTTCAATGAAGTAAAGTCTCAATTGGCCTTATTACTAA  
CBS5832 TCCCCTTTATTGTTTCTAAAAGTTCAATGAAGTAAAGTCTCAATTGGCCTTATTACTAA  
S288C 435250 TCCCCTTTATTGTTTCTAAAAGTTCAATGAAGTAAAGTCTCAATTGGCCTTATTACTAA 435309  
\*\*\*\* \*\*\*\*\*

CBS1503 CTAATAGGTATCTTATAATCACCTAATAAAAATAGTATGGCCGTGACATTTAAGGATGGTG  
CBS1513 CTAATAGGTATCTTATAATCACCTAATAAAAATAGTATGGCCGTGACATTTAAGGATGGTG  
CBS1538 CTAATAGGTATCTTATAATCACCTAATAAAAATAGTATGGCCGTGACATTTAAGGATGGTG  
CBS1174 CTAATAGGTATCTTATAATCACCTAATAAAAATAGTATGGCCGTGACATTTAAGGATGGTG  
CBS2440 CTAATAGGTATCTTATAATCACCTAATAAAAATAGTATGGCCGTGACATTTAAGGATGGTG  
W34/70 CTAATAGGTATCTTATAATCACCTAATAAAAATAGTATGGCCGTGACATTTAAGGATGGTG  
CBS1483 CTAATAGGTATCTTATAATCACCTAATAAAAATAGTATGGCCGTGACATTTAAGGATGGTG  
CBS1484 CTAATAGGTATCTTATAATCACCTAATAAAAATAGTATGGCCGTGACATTTAAGGATGGTG  
CBS2156 CTAATAGGTATCTTATAATCACCTAATAAAAATAGTATGGCCGTGACATTTAAGGATGGTG  
CBS5832 CTAATAGGTATCTTATAATCACCTAATAAAAATAGTATGGCCGTGACATTTAAGGATGGTG  
S288C 435310 CTAATAGGTATCTTATAATCACCTAATAAAAATAGTATGGCCGTGACATTTAAGGATGGTG 435369  
\*\*\*\*\*

CBS1503 TGATACTAGGTGCTGATTCACGTACCACCCTGGTGCGTACATAGCTAACCGTGTGACAG  
CBS1513 TGATACTAGGTGCTGATTCACGTACCACCCTGGTGCGTACATAGCTAACCGTGTGACAG  
CBS1538 TGATACTAGGTGCTGATTCACGTACCACCCTGGTGCGTACATAGCTAACCGTGTGACAG  
CBS1174 TGATACTAGGTGCTGATTCACGTACCACCCTGGTGCGTACATAGCTAACCGTGTGACAG  
CBS2440 TGATACTAGGTGCTGATTCACGTACCACCCTGGTGCGTACATAGCTAACCGTGTGACAG  
W34/70 TGATACTAGGTGCTGATTCACGTACCACCCTGGTGCGTACATAGCTAACCGTGTGACAG  
CBS1483 TGATACTAGGTGCTGATTCACGTACCACCCTGGTGCGTACATAGCTAACCGTGTGACAG  
CBS1484 TGATACTAGGTGCTGATTCACGTACCACCCTGGTGCGTACATAGCTAACCGTGTGACAG  
CBS2156 TGATACTAGGTGCTGATTCACGTACCACCCTGGTGCGTACATAGCTAACCGTGTGACAG  
CBS5832 TGATACTAGGTGCTGATTCACGTACCACCCTGGTGCGTACATAGCTAACCGTGTGACAG  
S288C 435370 TGATACTAGGTGCTGATTCACGTACCACCCTGGTGCGTACATAGCTAACCGTGTGACAG 435429  
\*\*\*\*\*

CBS1503 ATAAATTAACGAGAGTA  
CBS1513 ATAAATTAACGAGAGTA  
CBS1538 ATAAATTAACGAGAGTA  
CBS1174 ATAAATTAACGAGAGTA  
CBS2440 ATAAATTAACGAGAGTA  
W34/70 ATAAATTAACGAGAGTA  
CBS1483 ATAAATTAACGAGAGTA  
CBS1484 ATAAATTAACGAGAGTA  
CBS2156 ATAAATTAACGAGAGTA  
CBS5832 ATAAATTAACGAGAGTA  
S288C 435430 ATAAATTAACGAGAGTA 435446  
\*\*\*\*\*

**Supplementary Figure 10. Re-analysis of previously reported SNV sites (PRE3 locus).**

Full length multiple alignment of *PRE3* PCR-region from this study are shown. SNV sites are indicated as red. W34/70 shows hetero SNVs consistent with two homo SNVs. CBS5832 shows the same hetero SNVs, whereas in previous report, CBS5832 showed only homo SNVs. The minor allele frequency at these sites was about 1/3, implying that one of three homologous chromosomes may have a different allele; these minor alleles may have been overlooked in the previous analysis.
